# **Neurons of the inferior olive respond to broad classes of sensory input while subject to homeostatic control**

## *Homeostatic complex spike firing*

**Chiheng Ju<sup>1,3</sup>, Laurens W.J. Bosman<sup>1,3\*</sup>, Tycho M. Hoogland<sup>1,2,3\*</sup>,  
Arthiha Velauthapillai<sup>1</sup>, Pavithra Murugesan<sup>1</sup>, Pascal Warnaar<sup>1</sup>,  
Romano M. van Genderen<sup>1</sup>, Mario Negrello<sup>1</sup> and Chris I. De Zeeuw<sup>1,2</sup>**

<sup>1</sup> Department of Neuroscience, Erasmus MC, 3015 GD Rotterdam, The Netherlands

<sup>2</sup> Netherlands Institute for Neuroscience, Royal Netherlands Academy of Arts and Sciences,  
1105 BE Amsterdam, The Netherlands

<sup>3</sup> These authors contributed equally

\* Correspondence to Dr. Laurens Bosman, PO Box 2040, 3000 CA Rotterdam, The Netherlands, [l.bosman@erasmusmc.nl](mailto:l.bosman@erasmusmc.nl); or to Dr. Tycho Hoogland, PO Box 2040, 3000 CA Rotterdam, The Netherlands, [t.hoogland@erasmusmc.nl](mailto:t.hoogland@erasmusmc.nl)

Keywords: cerebellum, inferior olive, homeostatic mechanisms, sensory integration, Purkinje cell, climbing fibre.

## Abstract

1 **Cerebellar Purkinje cells integrate sensory information with motor efference copies to**  
2 **adapt movements to behavioural and environmental requirements. They produce**  
3 **complex spikes that are triggered by the activity of climbing fibres originating in**  
4 **neurons of the inferior olive. These complex spikes can shape the onset, amplitude and**  
5 **direction of movements as well as the adaptation of such movements to sensory**  
6 **feedback. Clusters of nearby inferior olive neurons project to parasagittally aligned**  
7 **stripes of Purkinje cells, referred to as “microzones”. It is currently unclear to what**  
8 **extent individual Purkinje cells within a single microzone integrate climbing fibre inputs**  
9 **from multiple sources of different sensory origins, and to what extent sensory-evoked**  
10 **climbing fibre responses depend on the strength and recent history of activation. Here**  
11 **we imaged complex spike responses in cerebellar lobule crus 1 to various types of**  
12 **sensory stimulation in awake mice. We find that different sensory modalities and**  
13 **receptive fields have a mild, but consistent, tendency to converge on individual Purkinje**  
14 **cells. Purkinje cells encoding the same stimulus show increased events with coherent**  
15 **complex spike firing and tend to lie close together. Moreover, whereas complex spike**  
16 **firing is only mildly affected by variations in stimulus strength, it strongly depends on**  
17 **the recent history of climbing fibre activity. Our data point towards a mechanism in the**  
18 **olivo-cerebellar system that regulates complex spike firing during mono- or**  
19 **multisensory stimulation around a relatively low set-point, highlighting an integrative**  
20 **coding scheme of complex spike firing under homeostatic control.**

## Introduction

21 The olivo-cerebellar system is paramount for sensorimotor integration during motor  
22 behaviour. The climbing fibres that originate in the inferior olive and cause complex spike  
23 firing in cerebellar Purkinje cells encode both unexpected and expected sensory events and  
24 affect initiation, execution as well as adaptation of movements (Albus, 1971; Welsh *et al.*,  
25 1995; Kitazawa *et al.*, 1998; Gibson *et al.*, 2004; Bosman *et al.*, 2010; Yang & Lisberger,  
26 2014; Ohmae & Medina, 2015; Ten Brinke *et al.*, 2015; Streng *et al.*, 2017; Apps *et al.*, 2018;  
27 Herzfeld *et al.*, 2018; Junker *et al.*, 2018). Complex spike firing frequency is typically  
28 sustained around 1 Hz and not substantially affected by the behavioural state, although short-  
29 lived increases or decreases in firing occur (Bloedel & Ebner, 1984; Mukamel *et al.*, 2009;  
30 Bosman *et al.*, 2010; Rahmati *et al.*, 2014; Zhou *et al.*, 2014; Hoogland *et al.*, 2015; Negrello  
31 *et al.*, 2018). To date, the paradox between the persistence of complex spike firing and the  
32 behavioural relevance of individual complex spikes is still largely unresolved.

33         Whereas the afferents of Purkinje cells, including not only the climbing fibres but also  
34 the parallel fibres and axons of interneurons, all diverge, their efferents strongly converge  
35 upon the cerebellar nuclei, ultimately integrating many different inputs from the brain  
36 (Harvey & Napper, 1991; Sugihara *et al.*, 2001; Person & Raman, 2011). The parallel fibres  
37 are oriented in a transverse direction along the lobular axes, while the climbing fibres and  
38 axons of the interneurons are running perpendicularly to them in line with the sagittal  
39 orientation of the dendritic trees of Purkinje cells (Andersen *et al.*, 1964; Szentágothai, 1965;  
40 Sugihara *et al.*, 1999; Sullivan *et al.*, 2005; Gao *et al.*, 2006; Sugihara *et al.*, 2009; Ruigrok,  
41 2011; Cerminara *et al.*, 2015; Apps *et al.*, 2018). Interestingly, the intrinsic biochemical  
42 nature as well as the electrophysiological profile of individual Purkinje cells follows the  
43 organization of the climbing fibres so that Purkinje cells located in the same sagittal module

44 receive climbing fibre input from the same olivary subnucleus and have similar identity  
45 properties, setting them apart from Purkinje cells in neighbouring modules (Xiao *et al.*, 2014;  
46 Zhou *et al.*, 2014; Cerminara *et al.*, 2015; De Zeeuw & Ten Brinke, 2015; Tsutsumi *et al.*,  
47 2015; Suvrathan *et al.*, 2016). Accordingly, Purkinje cell responses following electrical  
48 stimulation of major nerves of cat limbs largely adhere to the parasagittal organization of the  
49 climbing fibre zones (Oscarsson, 1969; Groenewegen *et al.*, 1979), which in turn can be  
50 further differentiated into smaller microzones based upon their response pattern to tactile  
51 stimulation of a particular spot on the body (Ekerot *et al.*, 1991; Apps & Garwicz, 2005;  
52 Ozden *et al.*, 2009; De Zeeuw *et al.*, 2011). Possibly, differential sensory maps even occur at  
53 the submicrozonal and individual Purkinje cell level, but this has to our knowledge not been  
54 investigated yet. In particular, it remains unclear to what extent different types of sensory  
55 input can drive complex spikes within the same individual Purkinje cells and/or their direct  
56 neighbours and how the strength as well as the history of these inputs influences the  
57 distribution of climbing fibre activity.

58         Here, we studied the impact of minimal stimuli of distinct sensory modalities on  
59 complex spike firing of Purkinje cells in crus 1 of awake mice using *in vivo* two-photon Ca<sup>2+</sup>  
60 imaging with Cal-520 (Tada *et al.*, 2014). This fluorescent sensor has been reported to be a  
61 more accurate reporter of fast spikes than commonly used genetically encoded sensors such as  
62 GCaMP6f (Lock *et al.*, 2015). We found that different sensory streams appear to converge on  
63 individual inferior olivary neurons and thereby Purkinje cells, that sensory stimulation  
64 primarily affects the timing of the complex spikes rather than their rate, that the strength of  
65 complex spike responses varied seamlessly from non-responsive to highly responsive, that a  
66 recent history of high activity leads to a future of low activity, and that Purkinje cells that  
67 respond to the same stimulus tend to be located in each other's vicinity and display increased  
68 levels of simultaneous firing. Together, our data indicate that subtle and local sensory inputs

- 69 can recruit mosaic ensembles of Purkinje cells, employing population coding in a spatially
- 70 and temporally dynamic way that is in line with homeostatic control.

## Methods

### 71 *Ethical approval*

72 All experimental procedures involving animals were in agreement with Dutch and European  
73 legislation and guidelines as well as with the ethical principles of The Journal of Physiology.  
74 The experiments were approved in advance by an independent ethical committee (DEC  
75 Consult, Soest, The Netherlands) as required by Dutch law and filed with approval numbers  
76 EMC2656, EMC3001 and EMC3168. Experiments were performed in compliance with the  
77 guidelines of the Animal Welfare Board of the Erasmus MC.

78

### 79 *Animals and surgery*

80 Mice were group housed until the day of the experiment and kept under a regime with 12 h  
81 light and 12 h dark with food and water available *ad libitum*. The mice had not been used for  
82 other experiments prior to the ones described here.

83 For the experiments performed in awake mice, we recorded from in total 66 field of  
84 views located in cerebellar lobule crus 1 of 29 male C57BL/6J mice of 4-12 weeks of age  
85 (Charles Rivers, Leiden, The Netherlands). Prior to surgery, mice were anaesthetized using  
86 isoflurane (initial concentration: 4% V/V in O<sub>2</sub>, maintenance concentration: ca. 2% V/V) and  
87 received Carprofen (Rimadyl, 5 mg/ml subcutaneously) to reduce post-surgical pain. Before  
88 the start of the surgery, the depth of anaesthesia was verified by the absence of a reaction to  
89 an ear pinch. To prevent dehydration, mice received 1 ml of saline s.c. injection before the  
90 surgeries commenced. Eyes were protected using eye ointment (Duratears, Alcon, Fort Worth,  
91 TX, USA). Body temperature was maintained using a heating pad in combination with a  
92 rectal thermometer. During surgery, we attached a metal head plate to the skull with dental  
93 cement (Superbond C&B, Sun Medical Co., Moriyama City, Japan) and made a craniotomy

94 with a diameter of approximately 2 mm centred on the medial part of crus 1 ipsilateral to the  
95 side of somatosensory stimulation. The dura mater was preserved and the surface of the  
96 cerebellar cortex was cleaned with extracellular solution composed of (in mM) 150 NaCl, 2.5  
97 KCl, 2 CaCl<sub>2</sub>, 1 MgCl<sub>2</sub> and 10 HEPES (pH 7.4, adjusted with NaOH). After surgery, the mice  
98 were allowed to recover from anaesthesia for at least 30 minutes. Subsequently, the mice were  
99 head-fixed in the recording setup and they received a bolus-loading of the Ca<sup>2+</sup> indicator Cal-  
100 520 (0.2 mM; AAT Bioquest, Sunnyvale, CA) (Tada *et al.*, 2014). Cal-520 was used as it is  
101 currently the best available green Ca<sup>2+</sup> dye, outperforming genetically encoded indicators  
102 such as GCaMP6f (Lock *et al.*, 2015). The dye was first dissolved with 10% w/V Pluronic F-  
103 127 in DMSO (Invitrogen, Thermo Fisher Scientific, Waltham, MA, USA) and then diluted  
104 20 times in the extracellular solution. The dye solution was pressure injected into the  
105 molecular layer (50–80 µm below the surface) at 0.35 bar for 5 min. Finally, the brain surface  
106 was covered with 2% agarose dissolved in saline (0.9% NaCl) in order to reduce motion  
107 artefacts and prevent dehydration.

108 For the experiments on single-whisker stimulation we made recordings under  
109 anaesthesia on 17 male C57BL/6J mice of 4-12 weeks of age. The procedure was largely the  
110 same as described above, but instead of isoflurane we used ketamine/xylazine as anaesthetic  
111 (i.p. injection via butterfly needle, initial dose: 100 mg/kg and 10 mg/kg, respectively;  
112 maintenance dose: approximately 60 mg/kg/h and 3 mg/kg/h, respectively). The mice  
113 remained under anaesthesia until the end of the recording. A subset of these experiments was  
114 performed with 0.2 mM Oregon Green BAPTA-1 AM dye (Invitrogen) as this dye has been  
115 more widely used than Cal-520 (e.g., Stosiek *et al.*, 2003; Ozden *et al.*, 2009; Schultz *et al.*,  
116 2009; Hoogland *et al.*, 2015). Oregon Green BAPTA-1 AM was dissolved and applied in the  
117 same way as Cal-520. We found that Cal-520 had a superior signal-to-noise ratio under our  
118 experimental conditions. As a consequence, the observed event rate was lower in the

119 experiments using OGB-1 (OGB-1:  $0.45 \pm 0.26$  Hz;  $n = 172$  cells; Cal-520:  $0.72 \pm 0.40$  Hz;  $n$   
120 = 43 cells; median  $\pm$  IQR;  $U = 1719.0$ ,  $p < 0.001$ , Mann-Whitney test). The observed  
121 frequency range using Cal-520 was comparable to that found using *in vivo* single-unit  
122 recordings under ketamine/xylazine anaesthesia:  $0.6 \pm 0.1$  Hz (Bosman *et al.*, 2010). Despite  
123 an underestimation of the complex spike rate using OGB-1, we found that the ratios of  
124 Purkinje cells that responded to single whisker stimulation were similar for both dyes (OGB-  
125 1: 89 out of 373 cells (24%); Cal-520: 35 out of 152 cells (23%);  $p = 0.910$ ; Fisher's exact  
126 test). For this reason, we combined the data from both dyes. For the analysis presented in Fig.  
127 11, we included only those cells that could be recorded during all stimulus conditions. All  
128 experiments using awake data were obtained with Cal-520.

129         At the end of each experiment, the mice were killed by cervical dislocation under  
130 isoflurane or ketamine/xylazine anaesthesia after which the brain was removed and the  
131 location of the dye injection in crus 1 was verified by epi-fluorescent imaging. The whole  
132 procedure, from initial anaesthesia to cervical dislocation, typically lasted around 6 to 8 h.

133

#### 134 *In vivo two-photon Ca<sup>2+</sup> imaging*

135 Starting at least 30 min after dye injection, *in vivo* two-photon Ca<sup>2+</sup> imaging was performed of  
136 the molecular layer of crus 1 using a setup consisting of a Ti:Sapphire laser (Chameleon  
137 Ultra, Coherent, Santa Clara, CA, USA), a TriM Scope II system (LaVisionBioTec, Bielefeld,  
138 Germany) mounted on a BX51 microscope with a 20x 1.0 NA water immersion objective  
139 (Olympus, Tokyo, Japan) and GaAsP photomultiplier detectors (Hamamatsu, Iwata City,  
140 Japan). A typical recording sampled a field of view of 40 x 200  $\mu$ m with a frame rate of  
141 approximately 25 Hz.

142         In a subset of experiments (Fig. 12A-C), larger field-of-views were obtained using a  
143 two-photon setup from Neurolabware (Los Angeles, CA, USA). Imaging occurred through a



144 16x (0.8 NA) objective (Nikon, Tokyo, Japan) in combination with a Chameleon Ultra II laser  
145 (Coherent) tuned to 920 nm at a frame rate of 15 Hz.

146

### 147 *Sensory stimulation*

148 Cutaneous stimuli were delivered to four defined regions on the left side of the face,  
149 ipsilateral to side of the craniotomy. These regions were the whisker pad, the cheek posterior  
150 to the whisker pad, the upper lip and the lower lip. Stimuli were applied using a Von Frey  
151 filament (Touch Test Sensory Evaluator 2.83, Stoelting Co., IL, USA) attached to a piezo  
152 linear drive (M-663, Physik Instrumente, Karlsruhe, Germany). Prior to the set of experiments  
153 described here, we tested a series of 8 Von Frey filaments with a stiffness range from 0.02 g  
154 to 1.4 g in awake head-fixed mice to select the optimal force for these experiments. We  
155 selected the 0.07 g (0.686 mN) filament because this filament induced a mild reaction in the  
156 mouse, but no signs of a nociceptive response (cf. Chaplan *et al.* (1994)). The touch time was  
157 fixed at 100 ms. As a control, we moved the stimulator without touching the face (“sound  
158 only” condition). Visual stimuli were delivered as 10 ms pulses using a 460 nm LED (L-  
159 7104QBC-D, Kingbright, CA, USA). The stimulation frequency was fixed at 1 Hz and the  
160 different stimuli were applied in a random order. Video recordings of the eye, made under  
161 infrared illumination, revealed that the mice did not make eye movements in response to the  
162 LED flash, but they did show reflexive pupil constriction (*data not shown*).

163 Single whiskers were stimulated using a piezo linear drive (M-663, Physik Instrumente)  
164 while using a deflection of 6°. It took the stimulator approximately 30 ms to reach this  
165 position. At the extreme position, the stimulator was paused for 150 ms before returning to the  
166 neutral position. The stimulator was designed to minimize contact with other whiskers. Each  
167 stimulation experiment consisted of five sessions in random order. During each block one of

168 the ipsilateral whiskers B2, C1, C2, C3 and D2 was stimulated. Each session consisted of 150  
169 stimuli at 2 or 3 Hz.

170

### 171 *Complex spike detection*

172 Image analysis was performed offline using custom made software as described and validated  
173 previously (Ozden *et al.*, 2008; Ozden *et al.*, 2012; De Gruijl *et al.*, 2014). In short,  
174 independent component analysis was applied to the image stack to discover masks describing  
175 the locations of individual Purkinje cell dendrites (e.g., see Fig. 2A). For each field of view,  
176 the mask was generated only once, so that the same Purkinje cells were analysed for  
177 subsequent recordings of different stimulus conditions enabling paired comparisons.

178 Experiments during which spatial drift occurred were discarded from subsequent analysis.

179 The fluorescence values of all pixels in each mask were averaged per frame. An 8% rolling  
180 baseline from a time window of 0.5 ms was subtracted from the average fluorescence per  
181 mask (Ozden *et al.* 2012), after which  $\text{Ca}^{2+}$  transient events were detected using template  
182 matching.

183

### 184 *Statistical analysis*

185 In general, we first tested whether parameter values were distributed normally using one-  
186 sample Kolmogorov-Smirnov or Shapiro-Wilk tests. If not, non-parametric tests were applied.  
187 When multiple tests were used, Benjamini-Hochberg correction for multiple comparisons was  
188 applied. For each experiment, stimuli were given in a random sequence. Identification of  
189 Purkinje cell dendrites and event extraction were performed by a researcher who was blind to  
190 the type of stimulus. For the experiments characterizing response characteristics of individual  
191 Purkinje cells, we compared the fraction of responsive Purkinje cells, the response latency and  
192 the response peak. After extracting the  $\text{Ca}^{2+}$  transient event times, peri-stimulus time

193 histograms (PSTHs) were constructed using the inter-frame time (approx. 40 ms) as bin size.  
194 Stacked line plots of Purkinje cell PSTHs were sorted by weak to strong peak responses. The  
195 data were normalized such that the top represents the average responses of all Purkinje cells.  
196 Statistical significance of responses occurring within 200 ms from stimulus onset was  
197 evaluated using a threshold of the mean + 3 s.d. of the firing rate during the 500 ms prior to  
198 stimulus onset (300 ms for the single whisker stimulation experiments, as they were  
199 performed with a higher stimulation frequency).

200 To calculate whether two or more inputs converged on single Purkinje cells we used a  
201 bootstrap method. First, we determined the fraction of responsive cells for each parameter and  
202 compared these to a randomly generated number between 0 and 1 as taken from a uniform  
203 distribution. If for each input the randomly generated numbers were lower than the measured  
204 fractions, we considered them as responsive to all stimuli. This procedure was repeated  
205 10,000 times and the average and standard deviation were derived and used to calculate the Z  
206 score of the experimental data. All bootstrap procedures were performed using custom-written  
207 code in LabVIEW (National Instruments, Austin, TX, USA).

208 A direct comparison between the full and partial correlations of the peak responses to  
209 tactile stimuli was performed in MATLAB (MathWorks, Natick, MA, USA) (Fig. 8A-B).  
210 Principal component analysis of the same dataset was also performed in MATLAB and  
211 compared to that of a bootstrapped dataset (Fig. 8C). The latter was obtained by shuffling the  
212 response peaks per stimulus condition 500 times. After each shuffle, a principal component  
213 analysis was performed of which the average ( $\pm 3$  s.d.) was calculated and plotted. The  
214 analyses described in Fig. 8A-C were performed on those 188 Purkinje cells that received all  
215 four tactile stimuli.

216 The distributions of pairs of Purkinje cells, either both responsive to a given stimulus  
217 (“responsive pairs”) or one cell being responsive and the other not (“heterogeneous pairs”),

218 were tested using two-dimensional Kolmogorov-Smirnov tests performed in MATLAB.  
219 Aggregate PSTHs (Fig. 13) were constructed and evaluated as described before (Romano *et*  
220 *al.*, 2018). Briefly, we calculated per individual frame the number of simultaneously  
221 occurring events and colour coded these in a PSTH combining data from all dendrites in a  
222 field of view. Based upon the total number of complex spikes and dendrites per recording, we  
223 calculated the expected number of simultaneous complex spikes per individual frame using a  
224 Poisson distribution. The actual number of simultaneous complex spikes was compared to this  
225 calculated distribution and a  $p$  value was derived for each number based upon the Poisson  
226 distribution (using custom-written software in MATLAB and LabVIEW). Unless mentioned  
227 otherwise, correlation analysis was performed in SigmaPlot (Systat Software, San Jose, CA,  
228 USA) and the other statistical tests were performed using SPSS (IBM, Armonk, NY, USA).

## Results

### 229 *Climbing fibre responses to tactile, auditory and/or visual input*

230 Little is known about the distribution and convergence of different types of climbing fibre-  
231 mediated sensory input at the level of individual, nearby Purkinje cells. Here, we performed  
232 two-photon  $\text{Ca}^{2+}$  imaging of Purkinje cells of awake mice to record complex spikes responses  
233 to various types of sensory stimulation related to the face of the mice. The recordings were  
234 made in crus 1 as this lobule is known to receive sensory input from the oro-facial region, in  
235 particular from the mystacial vibrissae (Fig. 1A) (Shambes *et al.*, 1978; De Zeeuw *et al.*,  
236 1990; Yatim *et al.*, 1996; Apps & Hawkes, 2009; Bosman *et al.*, 2011; De Gruijl *et al.*, 2013;  
237 Kubo *et al.*, 2018; Romano *et al.*, 2018). The configurations and positions of individual  
238 Purkinje cell dendrites were detected using independent component analysis (Fig. 1B).  $\text{Ca}^{2+}$   
239 transients were isolated per dendrite by a template-matching procedure that reliably detects  
240 complex spikes (Ozden *et al.*, 2008; De Gruijl *et al.*, 2014; Najafi *et al.*, 2014) (Fig. 1C-E).

241 We started our study of sensory responses by using air puff stimulation of the large  
242 facial whiskers, which is a relatively strong stimulus. In line with previous studies (Axelrad &  
243 Crepel, 1977; Brown & Bower, 2002; Bosman *et al.*, 2010; Apps *et al.*, 2018; Romano *et al.*,  
244 2018), we found that air puff stimulation to the whiskers evoked complex spike responses in  
245 many Purkinje cells (e.g., in 19 out of 19 Purkinje cells in the example illustrated in Fig. 2). In  
246 total, 102 out of the 117 (87%) cells analysed were considered to be responsive to such a  
247 stimulus, implying that the peak responses of these cells exceeded the threshold of the average  
248 + 3 s.d. of the pre-stimulus period.

249 Complex spikes are associated with a fast and large increase in intracellular  $\text{Ca}^{2+}$  in the  
250 dendrites of Purkinje cells, but other processes may also contribute to a rise in the intracellular  
251  $\text{Ca}^{2+}$  concentration (Najafi *et al.*, 2014; Roome & Kuhn, 2018). Indeed, in our data, we could

252 observe changes in fluorescence that were not related to complex spikes (Fig. 2H). To exclude  
253 the possibility that we erroneously detected such non-complex spike events as complex  
254 spikes, we overlaid trials with and without complex spikes. This revealed that fluorescent  
255 events that were not classified as complex spikes typically had smaller amplitudes and slower  
256 kinetics than complex spikes, with the exception of a very noisy recording where non-  
257 complex spikes were much faster than complex spikes (Fig. 3A). This confirms the  
258 impression revealed by Fig. 1D-E that complex spikes can be properly detected based upon  
259 their waveform, in line with previous reports using the same detection algorithm (Ozden *et*  
260 *al.*, 2008; De Gruijl *et al.*, 2014; Najafi *et al.*, 2014). To further characterise the rise times, we  
261 performed a set of experiments with a smaller field of view and a higher frame rate (100 Hz).  
262 These recordings revealed that virtually all events had a rise time of 1 or 2 frames (10 or 20  
263 ms) (Fig. 3B-D).

264 To address whether localized and more subtle stimuli recruited smaller groups of  
265 Purkinje cells, maybe even subsets of microzones, we subsequently applied gentle tactile  
266 stimulation at four facial locations: the whisker pad, the cheek posterior to the whisker pad,  
267 the upper lip and the lower lip (Fig. 4A). Although the precise somatotopy of climbing fibre  
268 projections to crus 1 is not known, it has been shown that the mossy fibre projections to crus 1  
269 convey somatosensory input mainly from the mystacial vibrissae and the surrounding skin,  
270 while the somatosensory input from the lips predominantly targets crus 2 (Shambes *et al.*,  
271 1978). The stimuli were given using a Von Frey filament (target force = 0.686 mN) attached  
272 to a piezo actuator. The stimulus strength was carefully calibrated to avoid inducing responses  
273 from neighbouring skin areas or nociceptive responses (see Methods). The strength of the  
274 Purkinje cell responses to any of the four tactile stimuli (998 stimulus conditions in 282  
275 Purkinje cells) had a skewed, but continuous distribution (Fig. 4B). Moreover, for individual  
276 stimulus locations such skewed distributions of response strengths were found as well, with

277 the upper lip being the least sensitive of the four facial areas (Fig. 5). In other words, our data  
278 set contained a gradient of both non-responsive and strongly responsive Purkinje cells. A  
279 distinction between “responsive” and “non-responsive” Purkinje cells therefore involved a  
280 somewhat arbitrary distinction, prompting us to present most of the subsequent analyses using  
281 the entire dataset.

282         Given that touches were delivered by a piezo-actuator that made a weak but audible  
283 sound, we also tested whether Purkinje cells responded to this sound in the absence of touch.  
284 This was the case, and, as expected, the “sound only” stimulus evoked the weakest responses  
285 of all stimuli ( $p < 0.001$ ; Kruskal-Wallis test; Fig. 5B). For comparison, we also included a  
286 visual stimulation, consisting of a brief (10 ms) flash of a blue LED. This stimulus evoked  
287 responses with a similar strength as the whisker pad and lower lip stimulation, but with a  
288 latency that was remarkably long (Fig. 5A).

289         To facilitate a quantitative comparison between the stimulus conditions, we  
290 subsequently focused on the subset of obvious responses, defined as having a peak amplitude  
291 exceeding our threshold for significance set at the average + 3 s.d. of the pre-stimulus period.  
292 Among these “significantly responding” Purkinje cells, we found trends as in the entire  
293 population: the lower lip recruited the strongest responses, directly followed by the whisker  
294 pad and visual stimulation, while upper lip and sound only stimulations were less effective  
295 (Fig. 4C-E; Table 1). We also confirmed the remarkably long latency, typically more than 100  
296 ms, for the visually evoked responses ( $p < 0.001$  compared to the tactile stimuli; Kruskal  
297 Wallis test; Fig. 4F; Table 1).

298

### 299 *Convergence of sensory inputs*

300 Next, we addressed the question whether Purkinje cells have a preference to respond to one or  
301 multiple types of stimulation. To this end, we made for each combination of two stimuli a

302 scatter plot of the response strengths of each individual Purkinje cell. For each and every  
303 combination, correlation analysis revealed a positive correlation, implying that a stronger  
304 response to one stimulus typically implied also a stronger response to the other (Fig. 6A).  
305 These correlations, although weak, were statistically significant for all combinations except in  
306 two cases (i.e., upper lip vs. sound only and upper lip vs. visual stimulation; Table 2). The  
307 regression lines deviated from the 45° line, suggesting that, although there is a tendency at the  
308 population level to combine inputs, individual Purkinje cells can display specificity for a  
309 given stimulus. The Venn diagrams in Fig. 6B-C highlight the degree of overlap for all  
310 combinations of two and three stimuli. For all combinations we found some but no complete  
311 overlap. Remarkably, when comparing the observed overlap with the expected overlap based  
312 upon a random distribution, all combinations occurred more often than predicted. We  
313 performed a bootstrap analysis (see Methods) to infer statistical significance and indeed, most  
314 combinations were observed significantly more often than expected from a random  
315 distribution of inputs (Fig. 6B-C, Tables 3 and 4). This also included the visual stimulation, so  
316 that those Purkinje cells responding to a tactile stimulus typically were responsive to visual  
317 stimulation as well.

318 One might wonder whether Purkinje cells in crus 1 encode specific sensory events or,  
319 alternatively, respond indifferently to any external trigger. In this context, the response pattern  
320 to the sound only stimulus is especially noteworthy. A weak, but audible sound was generated  
321 by the piezo actuator used to deliver the tactile stimuli. Hence, all tactile stimuli also involved  
322 sound. Nevertheless, the Venn diagrams in Fig. 6B show that there are Purkinje cells that  
323 responded statistically significantly to sound only, but not to sound and touch delivered  
324 simultaneously. This could be taken as an argument against the input-specificity of Purkinje  
325 cells. However, one should keep in mind that the separation between “responsive” and “non-  
326 responsive” Purkinje cells is arbitrary (cf. Fig. 4B), and to be able to draw such a conclusion,



327 there should be a consistent absence of preferred responses. The sound only stimulus was  
328 found to be the weakest stimulus (Figs. 4E and 5B) and pair-wise comparisons of the response  
329 strengths had a bias towards stimuli involving touch (Fig. 6A). This is further illustrated in a  
330 single experiment, directly comparing the responses evoked by whisker pad touch and sound  
331 only stimulation. Four randomly selected Purkinje cells from this experiment failed to show a  
332 response to sound only stimuli in the absence of touch responses (Fig. 7A-E). This was  
333 confirmed by the group-wise analysis of all Purkinje cells in this experiment, demonstrating a  
334 clear preference for the whisker pad stimulation over the sound only stimulus (Fig. 7F-G).

335 Thus, Purkinje cells in crus 1 seem to respond to multiple stimuli, although at the level  
336 of individual cells not all stimuli were equally effective in triggering complex spikes. To  
337 better disentangle the general responses from input-specific ones, we first focussed on the 188  
338 Purkinje cells that received all four tactile stimuli. A full correlation analysis on this dataset  
339 (Fig. 8A) revealed similar results as the pair-wise comparisons shown in Fig. 6A. A partial  
340 correlation analysis found reduced correlations, confirming the existence of a common factor.  
341 However, some, but not all, pair-wise combinations occurred above chance level (Fig. 8B). If  
342 Purkinje cells respond to a generic sensory event, irrespective of stimulus location, such  
343 deviations from chance are not expected. This analysis, therefore, confirms the notion of a  
344 combination of a generic and an input-specific response. The impact of the common factor,  
345 representing a generic sensory trigger, was further investigated using principal component  
346 analysis. It turned out that the first component could explain 45% of the variance, which is  
347 significantly more than expected by chance (32%; Fig. 8C) and confirms that somatosensory  
348 input to Purkinje cells is only partially related to the specific stimulus location.

349 To visualise the relation between a generic somatosensory response and input  
350 specificity, we made a scatter plot between the average peak responses to the four tactile  
351 stimuli versus the peak responses to each stimulus per Purkinje cell (Fig. 8D). Like in Fig. 4B,

352 our data do not support unambiguous discrimination between “sensory” and “non-sensory”  
353 Purkinje cells. Several Purkinje cells did not show much of a tactile response to any given  
354 stimulus location, while there are also Purkinje cells that showed clear responses. The  
355 minimal and maximal responses diverge when the average response is stronger (Fig. 8E). As  
356 the average response depends on the minimal and maximal responses, this is not an  
357 independent measure. However, when correlating the minimal and maximal responses  
358 directly, a similar pattern emerges: stronger minimal responses correlate with even stronger  
359 maximal responses (Spearman’s correlation:  $R = 0.56$ ,  $p < 0.001$ ). In other words, Purkinje  
360 cells that respond to somatosensory stimulation at any given facial location are also prone to  
361 react to stimulation at another spot on the face. However, the Purkinje cells with a stronger  
362 “generic response” also had a stronger bias towards one or a few stimulus locations. Again,  
363 complex spike responses seem to be involved in the combination and not the segregation of  
364 sensory inputs, at the expense of a loss of input specificity. Similar analyses relating to  
365 auditory and visual stimulation showed that these conclusions generalize to other sensory  
366 modalities (Fig. 8F-G).

367

### 368 *Stimulus strength has limited impact on complex spike responses*

369 To avoid recruiting responses from adjacent areas, we used weak stimulation strengths (Figs.  
370 4 and 5). Under anaesthesia, the strength of a stimulus affects the complex spike response  
371 probability (Eccles *et al.*, 1972; Bosman *et al.*, 2010). This finding has been reproduced in  
372 awake mice using variations in duration and strength of peri-ocular air puff stimulation  
373 (Najafi *et al.*, 2014). As a consequence, our approach using weak stimuli could have led to an  
374 underestimation of the number and spatial extent of sensory climbing fibre responses. To  
375 study whether the stimulus strength could also have affected our results, we performed an  
376 experiment in which we stimulated all whiskers mechanically with three different strengths,

377 the largest of which was identical to the maximal stimulus we previously applied under  
378 anaesthesia (Bosman *et al.*, 2010). The chosen stimulus intensities maximized the variation in  
379 kinetic energy, which was the most salient feature for barrel cortex neurons (Arabzadeh *et al.*,  
380 2004). Stimulus strengths were randomly intermingled (Fig. 9A-B). Raw traces indicate that,  
381 even at the ensemble level, weak stimuli do not trigger responses at every trial and  
382 spontaneous complex spike firing may occasionally appear as peaks prior to stimulus onset  
383 (Figs. 2C, 9C-D).

384 Of the 340 Purkinje cells tested in awake mice, 209 (61%) responded statistically  
385 significantly to at least one stimulus strength. In these 209 Purkinje cells, we compared the  
386 complex spike responses across three intensities. The weak and the moderate intensities (1  
387 mm displacement reached in 62 ms and 2 mm displacement reached in 31 ms, respectively)  
388 showed a comparable number of responses and only the strong stimulus intensity (4 mm  
389 reached in 16 ms) evoked significantly more responses ( $F(2) = 57.160$ ,  $p < 0.001$ , Friedman's  
390 test) (Figs. 9D-E). Despite being 16 times faster (250 mm/s instead of 16 mm/s), the strongest  
391 stimulus recruited only 28% (measured as peak response) or 34% (measured as integral of  
392 whole response period) more complex spikes than the weakest stimulus (Fig. 9E-G). The  
393 same analysis on the whole population of Purkinje cells, including those that did not show a  
394 statistically significant response, revealed even less of an impact of stimulus strength (*data*  
395 *not shown*). We therefore conclude that the complex spike response encodes poorly the  
396 velocity of whisker displacement in awake mice and that – within boundaries – using stronger  
397 stimuli does not necessarily lead to qualitatively different results.

398

399 *Functionally equivalent Purkinje cells tend to group together*

400 So far, we mainly found an abundance of weak and fairly non-specific complex spike  
401 responses to mild sensory stimulation. One way in which such weak responses at the cellular

402 level could still have considerable effects at the network level would be when functionally  
403 equivalent Purkinje cells would lie together in microzones. Indeed, as the Purkinje cells of  
404 each microzone project to a group of adjacent neurons in the cerebellar nuclei (Voogd &  
405 Glickstein, 1998; Apps & Hawkes, 2009), population encoding of sensory events may be a  
406 form of functional signalling in the olivo-cerebellar system. Fig. 10 illustrates to what extent  
407 adjacent Purkinje cells have similar stimulus response probabilities. In this example, Purkinje  
408 cells responding strongly to whisker pad stimulation are grouped together, but such a spatial  
409 clustering does not seem to be perfect, as also a few strongly responsive cells are located in  
410 between less responsive Purkinje cells (Fig. 10A) and as upper lip-responsive Purkinje cells  
411 are sparsely distributed across the same area (Fig. 10B). We reasoned that spatial clustering  
412 should imply that two neighbouring cells have more similar response probabilities than  
413 randomly selected cells from the same field of view. This turned out to be the case, but only if  
414 we confined our focus to Purkinje cells with statistically significant responses ( $Z > 3$ ) (Fig.  
415 10C-D). Thus, especially the Purkinje cells with stronger responses to a given stimulus type  
416 were located closer than could be expected from a random distribution.

417

#### 418 *Single whisker responses in Purkinje cells*

419 Using our tactile stimuli we demonstrated a tendency of nearby Purkinje cells to encode the  
420 same stimulus. To study whether this would hold true for even smaller receptive fields we  
421 turned to single whisker stimulation. Using single-unit electrophysiological recordings, we  
422 have previously shown that stimulation of a single whisker is sufficient to evoke complex  
423 spike responses (Bosman *et al.*, 2010). Individual whiskers can be reliably identified across  
424 mice and as such they can be qualified as minimal reproducible receptive fields. We repeated  
425 our previous single-whisker stimulation experiments now using two-photon  $\text{Ca}^{2+}$  imaging  
426 focusing on five whiskers that were stimulated individually in a random sequence. To prevent

427 spontaneous whisking and thereby interference by other whiskers, these experiments were  
428 (unlike all other experiments in this study) performed under anaesthesia. In general, the  
429 responses were specific, as many Purkinje cells responded to a particular whisker, but not to  
430 its neighbouring whiskers (Fig. 11A). Overall, of the 148 Purkinje cells tested, 31 (21%)  
431 responded significantly to only one of the five whiskers tested, 14 (10%) to two and 5 (3%) to  
432 three whiskers (Fig. 11B). Not all whiskers were equally effective in recruiting Purkinje cell  
433 responses: 23 cells (15%) responded significantly to C3 stimulation, but only 4 (3%) to C1  
434 stimulation. Likewise, pairs of more anterior whiskers had higher chances to be encoded by  
435 the same Purkinje cell (Fig. 11C; Table 5). Thus, also for single whisker stimulation, there  
436 was a balance between sensory integration and specificity.

437         Next, we examined the spatial distribution of responsive Purkinje cells. In Fig. 11D  
438 two nearby recording spots from the same mouse are shown. In recording spot 1, from which  
439 the example in Fig. 11A originates, all Purkinje cells responded to stimulation of at least one  
440 whisker. However, in the second recording spot, only two Purkinje cells responded: both to a  
441 single, but different whisker. For each recording spot we compared responsive vs. non-  
442 responsive Purkinje cells, taking the average + 3 s.d. of the baseline as threshold for  
443 responsiveness. This yielded a clear separation for the Purkinje cells in the first, but a rather  
444 poor one in the second recording spot (Fig. 11E). In terms of number of responsive Purkinje  
445 cells and response amplitudes, these two recordings, although made from the same lobule in  
446 the same animal, form relatively extreme examples in our dataset. When plotting the response  
447 strength versus the fraction of responsive Purkinje cells per field of view, we found a positive  
448 correlation (Pearson correlation:  $R = 0.52$ ,  $p < 0.001$ ; Fig. 11F), implying that Purkinje cells  
449 with stronger responses to a certain whisker tended to be surrounded by other Purkinje cells  
450 encoding the same whisker – in line with the much stronger responses in the first than in the  
451 second recording spot illustrated in Fig. 11D-E. Taken together, stimulating single whiskers

452 revealed a similar organization as did the less specific stimuli (see Fig. 10) with a clear  
453 tendency of Purkinje cells with the same receptive field to be located close together.  
454 However, the spatial clustering was incomplete and especially weakly responsive Purkinje  
455 cells were found to be interspersed with completely unresponsive Purkinje cells.

456

#### 457 *Functionally equivalent Purkinje cells fire coherently*

458 In addition to spatial clustering, a second requirement for population encoding may be  
459 coherence of complex spike firing. While we refer to synchrony of two active Purkinje cells  
460 when they fire simultaneously within bins of 2 ms, we define coherence as firing  
461 simultaneously within bins of 40 ms. Time frames of 40 ms, which have historically also  
462 described as contemporaneous firing (Wylie *et al.*, 1995), fall well within the subthreshold  
463 oscillation cycle of inferior olivary neurons *in vivo* (Khosrovani *et al.*, 2007). Under  
464 anaesthesia, clusters of Purkinje cells tend to have increased coherence. These clusters  
465 organize in parasagittal stripes and their occurrence has been linked to zebrin bands (Sugihara  
466 *et al.*, 2007; Ozden *et al.*, 2009; Tsutsumi *et al.*, 2015). To examine whether such parasagittal  
467 bands could also be detected in awake mice, we performed a set of imaging experiments with  
468 a larger field of view, but at a lower frame rate (15 Hz). Correlation analysis of these data  
469 confirmed the existence of parasagittally oriented clusters, although the demarcation of the  
470 clusters was not as sharp as observed under anaesthesia (cf. Ozden *et al.*, 2009; Tsutsumi *et*  
471 *al.*, 2015) (Fig. 12A-C).

472 As most of the variation could be found along the medio-lateral axis, we proceeded  
473 with smaller field of views along the medio-lateral axis to allow for a higher temporal  
474 resolution. We applied coherence analysis on spontaneous and modulation data obtained from  
475 Purkinje cells with significant responses in awake mice. Pairs of Purkinje cells with  
476 significant responses upon whisker pad stimulation showed a significantly increased level of

477 coherence ( $p < 0.001$ ; two-dimensional Kolmogorov-Smirnov test) compared to that of  
478 heterogeneous pairs (i.e. pairs of one responsive and one non-responsive Purkinje cell) (Fig.  
479 12D-E). When we examined the firing pattern of the same pairs in the absence of sensory  
480 stimulation, we found similar results (Fig, 12F), indicating that it is not the sensory input per  
481 se that directs coherence. These findings were confirmed in the whole population, taking also  
482 the other tactile and visual stimuli into account (Fig. 12G-H). Only stimulation of the upper  
483 lip, the area least represented among the recorded Purkinje cells (Fig. 5B), revealed less of a  
484 discrimination between significantly responsive and heterogeneous pairs. Hence, we conclude  
485 that not only spatial clustering but also coherence patterning of functionally equivalent  
486 Purkinje cells may facilitate population encoding.

487

#### 488 *Population responses*

489 In general, the level of coherence among functionally equivalent Purkinje cells was relatively  
490 low, with a correlation coefficient seldom exceeding 0.3 (Fig. 12). However, in this analysis  
491 we did not discriminate between complex spike firing in response to sensory stimulation and  
492 complex spikes occurring spontaneously during inter-trial intervals. Therefore, we  
493 subsequently quantified the distribution of complex spikes over time, segregating both types  
494 of spikes. This is illustrated for a representative field of view in Fig. 13A. For each frame, we  
495 summed all complex spikes of the 17 Purkinje cells in this field of view and subsequently  
496 made an aggregate peri-stimulus time histogram of all these Purkinje cells, whereby we  
497 colour-coded the number of complex spike recorded per frame (see also Romano *et al.*  
498 {Romano, 2018 #4219}). The darker the colour, the more complex spikes occurred  
499 simultaneously. Clearly, the darker colours – and thus the stronger coherence – were observed  
500 during the stimulus response period. This occurrence of coherent firing over time was  
501 compared with a random redistribution of the spikes per Purkinje cell (based upon a Poisson

502 distribution). Note that an equal distribution would imply on average less than two complex  
503 spikes being fired during each frame of 40 ms, indicating the highly patterned distribution  
504 found during the experiments. The grey bars in Fig. 13B indicate the level of coherence that  
505 could be expected by chance, while the red ones indicate highly unlikely values. This shows  
506 that especially the higher levels of coherence are task-related, while spatially isolated firing  
507 occurs irrespective of stimulation.

508 Examination of the aggregate PSTHs confirms what could already be seen in Fig. 4D,  
509 in that there is a trend of reduced inter-trial firing for those stimuli with a relatively strong  
510 response (Fig. 13A-B). In this experiment, we plotted the responses to air puff stimulation,  
511 which recruited statistically significant responses in 17 out of 17 Purkinje cells, on top of  
512 those to lower lip stimulation, which recruited only 1 of the 17 Purkinje cells, illustrating the  
513 reduced baseline firing during air puff stimulation (Fig. 13C). When we calculated the  
514 average complex spike firing for each stimulus condition over the whole population of  
515 recorded Purkinje cells, we found that to be remarkably constant. Even 1 Hz air puff  
516 stimulation, able to recruit strong complex spike responses, did not result in increased  
517 complex spike firing as compared to an epoch without any form of stimulation (Fig. 13D),  
518 pointing towards a homeostatic mechanism within the inferior olive that balances out complex  
519 spike firing over longer time intervals.

520

#### 521 *Homeostasis of complex spike firing*

522 To further study the impact of complex spike homeostasis, we averaged the PSTHs of all  
523 Purkinje cells with statistically significantly responses to air puff stimulation and compared  
524 these to the firing rate in recordings made in the absence of stimulation (using pseudo-triggers  
525 generated at the same 1 Hz rate). This pair-wise comparison confirmed that the increase in  
526 complex spike firing during the sensory-induced responses comes at the expense of inter-trial



527 firing. The same was true for the milder whisker pad stimulation. However, because the  
528 responses were weaker, the effect on the inter-trial firing was less than that following strong  
529 air puff stimulation. The homeostatic effect was also observed following visual stimulation,  
530 although this type of stimulation induced an oscillatory response, making the effect less  
531 visible (Fig. 14A-B). Taking the whole population into account, thus also the Purkinje cells  
532 without a statistically significant response, there proved to be a correlation between the peak  
533 of the stimulus response and the decrease in inter-trial firing ( $R = 0.40$ ,  $p = 0.001$  and  $R =$   
534  $0.31$ ,  $p = 0.001$ , Pearson correlations for air puff and whisker pad stimulation, respectively;  
535 Fig. 14C). Only following visual stimulation, this correlation was less obvious ( $R = 0.20$ ,  $p =$   
536  $0.201$ , Pearson correlation after Benjamini-Hochberg correction), possibly due to the  
537 oscillatory responses evoked by visual stimulation.

## Discussion

538 Complex spike firing may appear notoriously unpredictable as its spontaneous frequency is  
539 low, yet sustained, and its response rate is at best moderate, with large jitters and an  
540 ambiguous relation to stimulus strength. This raises the question as to how the inferior olive  
541 relays its signals over time. Possibly, simultaneous complex spike firing by neighbouring  
542 Purkinje cells might jointly represent a stimulus, together covering the required signalling for  
543 a particular temporal domain (Sasaki *et al.*, 1989; Lang *et al.*, 1999; Sugihara *et al.*, 2007;  
544 Ozden *et al.*, 2009; Schultz *et al.*, 2009). Furthermore, the spatial relation between  
545 somatotopic patches and parasagittally oriented microzones has not been clarified in terms of  
546 complex spike signalling, and it is not understood to what extent this relation also depends on  
547 the temporal context in which the signals are generated.

548         Here, we investigated at the level of individual Purkinje cells whether encoding of  
549 somatosensory input from different facial areas in lobule crus 1 occurs in striped microzones  
550 or instead follows a more fractured arrangement. Mild touches at localized facial areas  
551 revealed a loose version of fractured somatotopy. Purkinje cells with the same receptive field  
552 tended to be located in each other's neighbourhood, but the spatial organization was not very  
553 strict, as highly responsive Purkinje cells were sometimes observed amidst non-responsive  
554 ones. Functionally equivalent, adjacent Purkinje cells showed increased coherence in their  
555 complex spike firing, in particular in response to sensory stimulation. Moreover, homeostatic  
556 mechanisms were engaged, ensuring that over longer periods complex spike firing rates are  
557 constant, making the short-lived coherent responses more salient.

558 *The functional role of climbing fibre activity*

559 Clinical manifestations of inferior olivary dysfunction range from ataxia and tremor to autism  
560 spectrum disorders (Llinás *et al.*, 1975; Samuel *et al.*, 2004; Bauman & Kemper, 2005; Welsh  
561 *et al.*, 2005; Lim & Lim, 2009; De Gruijl *et al.*, 2013). Climbing fibre-evoked complex spikes  
562 are also essential for the proper timing, size and direction of movements as well as for the  
563 encoding of expected and unexpected deviations from planned movements (Wang *et al.*,  
564 1987; Simpson *et al.*, 1996; Kitazawa *et al.*, 1998; Ito, 2013; Yang & Lisberger, 2014;  
565 Herzfeld *et al.*, 2018; Romano *et al.*, 2018). In addition, climbing fibre activity is crucial for  
566 cerebellar learning by controlling synaptic plasticity at a wide variety of synapses in the  
567 molecular layer of the cerebellar cortex (Ito & Kano, 1982; Ito, 2003; Coesmans *et al.*, 2004;  
568 Van Der Giessen *et al.*, 2008; Gao *et al.*, 2012). Despite these many functions, complex spike  
569 firing is remarkably stable over longer intervals, suggesting that the impact of complex spikes  
570 is strongly context-dependent.

571         This context is provided by the synaptic inputs to the inferior olive that relay  
572 information from excitatory ascending and descending pathways as well as inhibitory  
573 projections from the hindbrain (De Zeeuw *et al.*, 1998). Both types converge on each  
574 individual spine present on the dendrites of the inferior olivary neurons (De Zeeuw *et al.*,  
575 1989; De Zeeuw *et al.*, 1990). The inhibitory input predominantly originates from the  
576 cerebellar nuclei, implying that part of the context is mediated by one of the target regions of  
577 the climbing fibres themselves. This feedback is engaged in a closed loop, as individual  
578 climbing fibres of each olivary subnucleus project to the Purkinje cells located within a  
579 specific parasagittal zone (Sugihara *et al.*, 2001) that converge on the neurons in the  
580 cerebellar nuclei that project back to the same olivary subnucleus where the loop started  
581 (Groenewegen *et al.*, 1979; Voogd & Glickstein, 1998; Apps *et al.*, 2018). Each module can  
582 be further subdivided into microzones within which complex spike coherence is clearly

583 enhanced upon strong stimulation (Ozden *et al.*, 2009; Tsutsumi *et al.*, 2015), a phenomenon  
584 that is promoted by strong electrotonic coupling within olivary glomeruli (Sotelo *et al.*, 1974;  
585 Ruigrok *et al.*, 1990; Devor & Yarom, 2002; De Gruijl *et al.*, 2014). Under anaesthesia,  
586 complex spike coherence adheres relatively well to the delineation of zebrin bands (Sugihara  
587 *et al.*, 2007; Ozden *et al.*, 2009; Tsutsumi *et al.*, 2015). In awake mice, the spatial and  
588 functional demarcation between adjacent coherent clusters of Purkinje cells is diminished  
589 (Fig. 12B and De Gruijl *et al.* (2014)), probably due to the more diverse pattern of synaptic  
590 input to the inferior olive present in awake mice. Thus, although anatomical and functional  
591 data support the microzonal organization, the activity patterns are best understood as  
592 produced dynamically depending on the behavioural context that is transmitted via cerebellar  
593 and extra-cerebellar synaptic input (Negrello *et al.*, 2018).

594         A particularly interesting model system to study differential functional roles of  
595 climbing fibre activity is classical eyeblink conditioning. Subjects can readily learn to  
596 associate a previously neutral stimulus with an aversive puff to the eye. Before training,  
597 complex spikes virtually only occur after the unconditioned air puff stimulus. However, after  
598 training, the initial neutral stimulus, the conditioned stimulus, also reliably triggers complex  
599 spike responses at the onset time of the conditioned response (Halverson *et al.*, 2015; Ohmae  
600 & Medina, 2015; Ten Brinke *et al.*, 2015). It appears that the nature of the conditioned  
601 stimulus, whether auditory, visual or tactile (Hilgard & Marquis, 1936; McCormick &  
602 Thompson, 1984; Das *et al.*, 2001; Galvez *et al.*, 2006) is of subordinate relevance in this  
603 respect and that the main goal of these conditioned stimulus related complex spikes is to  
604 further improve the conditioned motor response (Ohmae & Medina, 2015; Ten Brinke *et al.*,  
605 2015; Ten Brinke *et al.*, 2019). However, the conditioned stimulus does not generalize:  
606 subjects trained with a visual conditioned stimulus will not blink after receiving an auditory  
607 stimulus for instance, although the associative learning process for a second stimulus goes

608 faster than for the first (Kehoe & Holt, 1984; Campolattaro & Freeman, 2009; Campolattaro  
609 *et al.*, 2015). Such a flexible arrangement would be very much in line with our data. In a naïve  
610 mouse, multiple weak sensory streams as well as internally generated sensorimotor prediction  
611 signals may converge on individual Purkinje cells (present study; Heffley *et al.* (2018)).  
612 Consequently, most sensory stimuli trigger only weak complex spike responses. Given the  
613 behavioural saliency, one or a few pathways may grow stronger and account for the Purkinje  
614 cells with a strong complex spike response. Thus, there is a balance between generalized  
615 input, encoding basically any sensory or internally generated event, and input-specificity.

616 To what extent motor related enhancement of complex spikes responses as observed  
617 during eyeblink conditioning are module-dependent remains to be shown. In principle such  
618 responses might be dominant in zebrin-negative modules, in which simple spike responses are  
619 suppressed during learning (De Zeeuw & Ten Brinke, 2015) and in which climbing fibre  
620 responses can further facilitate such suppression (Ten Brinke *et al.*, 2015). In zebrin-positive  
621 zones, in which the expression of learned responses are more driven by increases of simple  
622 spike responses (De Zeeuw & Ten Brinke, 2015; Voges *et al.*, 2017; Romano *et al.*, 2018),  
623 the opposite might occur. For example, it has been shown that olivary activity can be inhibited  
624 and gated when sensory stimuli are applied in a predictable fashion during self-generated  
625 locomotion (Gibson *et al.*, 2004).

626

### 627 *Receptive fields of Purkinje cells and population coding*

628 Several existing maps of somatosensory representations of complex spike activity suggest a  
629 fractured somatotopy (Miles & Wiesendanger, 1975; Rushmer *et al.*, 1980; Castelfranco *et*  
630 *al.*, 1994). These maps were typically created by establishing, for each recording position, the  
631 strongest input region, disregarding information on convergence of multiple inputs. These  
632 studies made clear, however, that climbing fibres could have receptive fields of widely

633 different sizes, expanding to structures as large as a whole limb (Thach, 1967; Leicht *et al.*,  
634 1973). Here, we show at the single cell resolution that climbing fibres indeed do convey  
635 somatosensory input from different areas, with Purkinje cells having the same receptive fields  
636 being located preferably in each other's proximity.

637 Our data reveal that classification of Purkinje cells into responsive and non-responsive  
638 cells is at best disputable, with the large majority of Purkinje cells typically showing relatively  
639 weak responses (Fig. 4B). Whisker pad stimulation elicits the strongest responses in lateral  
640 crus 1 (Romano *et al.*, 2018), while most of the current data were collected in more medial  
641 parts of crus 1. Consequently, only a few Purkinje cells included in the present study showed  
642 a strong response to whisker stimulation. Remarkably, these were the ones that did depend on  
643 stimulus strength, in contrast to the majority of the weakly responsive Purkinje cells (Fig. 9F).  
644 This may point to the existence of two groups of Purkinje cells: some that show complex  
645 spike responses that clearly depend on stimulus strength, in line with previous reports (Eccles  
646 *et al.*, 1972; Bosman *et al.*, 2010; Najafi *et al.*, 2014), and others that display only a weak to  
647 moderate sensitivity to a specific sensory input, independent of stimulus strength.

648 For the Purkinje cells with strong responses, a function in the timing and/or fine-  
649 tuning of motor responses is likely. Complex spikes have been shown to adjust saccadic eye  
650 movements on a trial-by-trial basis (Yang & Lisberger, 2014; Herzfeld *et al.*, 2018). They are  
651 also correlated to the amplitude of reflexive whisker movements (Romano *et al.*, 2018). The  
652 abundance of weak responses could, as discussed above for zebrin-negative modules, possibly  
653 be explained in terms of forming a substrate for cerebellar learning, where specific training  
654 would strengthen particular pathways as, for instance, occurs during classical eyeblink  
655 conditioning (Ten Brinke *et al.*, 2015).

656 An alternative, but not mutually exclusive, explanation for the presence of weak  
657 responses could be multi-sensory integration. Analysing the response rates of Purkinje cell

658 ensembles revealed that the density of responsive cells is crucial for shaping the population  
659 response. We propose that the weak spatial clustering of Purkinje cells encoding the same  
660 stimulus, being interspersed with Purkinje cells receiving input from other sources, and the  
661 tendency of coherent firing of Purkinje cells encoding the same stimulus both contribute to  
662 the creation of a heterogeneous map of Purkinje cells, where each area encodes a particular  
663 functional set of inputs. Each of the properties of the complex spikes seems rather  
664 insignificant in isolation, but in combination may result in specific and robust population  
665 encoding.

666

#### 667 *Non-tactile inputs*

668 Light or sound can act as conditional stimulus to recruit increasingly more climbing fibre  
669 activity during learning, highlighting the flexibility of this pathway (Ohmae & Medina, 2015;  
670 Ten Brinke *et al.*, 2015). In naïve animals, auditory and visual input have been shown to  
671 project predominantly to the vermis (Snider & Stowell, 1944), but we demonstrate here that  
672 visual and auditory input can converge on the same Purkinje cells that encode somatosensory  
673 input in crus 1 – also in naïve mice – further strengthening the notion that climbing fibre  
674 activity can act as an integrator of contextual input. With visual stimulation the latency was  
675 significantly longer than expected. Probably, the presented visual stimulus is not directly  
676 relayed from the retina, but a descending input from the visual cortex or other higher brain  
677 regions such as the mesodiencephalic junction (De Zeeuw *et al.*, 1998).

678

#### 679 *Homeostasis of complex spike frequency*

680 The overall firing rate of complex spikes was stable across conditions, with response peaks  
681 being compensated by reduced inter-trial firing (see also Negrello *et al.* (2018)). The stronger  
682 the response peak, the less inter-trial firing, leading to homeostasis of complex spike firing

683 over longer time periods. Intriguingly, the complex spikes during the inter-trial intervals were  
684 predominantly fired by a few, dispersed Purkinje cells and the response peak was largely due  
685 to increased coherence. It seems therefore that Purkinje cells display a basic complex spike  
686 firing rate, which in the absence of functional behaviour is not coherent with adjacent  
687 Purkinje cells. In view of the strong impact of complex spikes on synaptic plasticity (Ito &  
688 Kano, 1982; Ito, 2003; Coesmans *et al.*, 2004; Gao *et al.*, 2012), this could subserve  
689 homeostatic functions. Salient stimuli are largely encoded by coherent firing, making them  
690 different from non-stimulus related activity.

691         Short-lived excursions from the stereotypic 1 Hz complex spike frequency occur often.  
692 Many studies have documented a 10 Hz rhythm in complex spike firing (Bell & Kawasaki,  
693 1972; Wylie *et al.*, 1995; Lang *et al.*, 1999; Blenkinsop & Lang, 2006), which is sustained  
694 over longer periods after harmaline application (Llinás & Volkind, 1973). Also our current  
695 data (e.g., see double spike in Fig. 1D) show that the inferior olive as well as the Purkinje  
696 cells are physically able to fire much faster than at 1 Hz. Several mechanisms may contribute  
697 to the homeostatic control of inferior olivary spiking, including the previously mentioned  
698 olivo-cerebellar loops. Disrupted Purkinje cell activity can affect climbing fibre activity  
699 (Chen *et al.*, 2010) and reduced inferior olivary activity leads to enhanced simple spike  
700 activity (Montarolo *et al.*, 1982), which in turn dampens activity in the GABAergic neurons  
701 of the cerebellar nuclei that controls the inferior olive (Chaumont *et al.*, 2013; Witter *et al.*,  
702 2013). The interplay between glutamatergic input to the neurons of the inferior olive,  
703 intracellular signalling and electrotonic coupling may also lead to homeostatic control of  
704 complex spike firing via PKA and  $\beta$ CaMKII (Mathy *et al.*, 2014; Bazzigaluppi *et al.*, 2017).  
705 Overall, the inferior olive functions at the cross road of well-defined and rigid anatomical  
706 structures and highly dynamic synaptic input, while subject to homeostatic control, the  
707 sources of which still are partly to be determined.



708 **References**

709

710 Albus JS. (1971). Theory of cerebellar function. *Math Biosci* 10, 25-61.

711 Andersen P, Eccles JC & Voorhoeve PE. (1964). Postsynaptic inhibition of cerebellar

712 Purkinje cells. *J Neurophysiol* 27, 1138-1153.

713

714 Apps R & Garwicz M. (2005). Anatomical and physiological foundations of cerebellar  
715 information processing. *Nat Rev Neurosci* 6, 297-311.

716

717 Apps R & Hawkes R. (2009). Cerebellar cortical organization: a one-map hypothesis. *Nat*  
718 *Rev Neurosci* 10, 670-681.

719

720 Apps R, Hawkes R, Aoki S, Bengtsson F, Brown AM, Chen G, Ebner TJ, Isope P, Jorntell H,  
721 Lackey EP, Lawrenson C, Lumb B, Schonewille M, Sillitoe RV, Spaeth L, Sugihara I, Valera  
722 A, Voogd J, Wylie DR & Ruigrok TJH. (2018). Cerebellar modules and their role as  
723 operational cerebellar processing units. *Cerebellum*.

724

725 Arabzadeh E, Panzeri S & Diamond ME. (2004). Whisker vibration information carried by rat  
726 barrel cortex neurons. *J Neurosci* 24, 6011-6020.

727

728 Axelrad H & Crepel F. (1977). Représentation sélective des vibrisses mystaciales au niveau  
729 des cellules de Purkinje du cervelet par la voie des fibres grimpantes chez le rat. *C R Acad Sci*  
730 *Hebd Seances Acad Sci D* 284, 1321-1324.

731

732 Bauman ML & Kemper TL. (2005). Neuroanatomic observations of the brain in autism: a  
733 review and future directions. *Int J Dev Neurosci* 23, 183-187.  
734

735 Bazzigaluppi P, Isenia SC, Haasdijk ED, Elgersma Y, De Zeeuw CI, van der Giessen RS & de  
736 Jeu MTG. (2017). Modulation of murine olivary connexin 36 gap Junctions by PKA and  
737 CaMKII. *Front Cell Neurosci* 11, 397.  
738

739 Bell CC & Kawasaki T. (1972). Relations among climbing fiber responses of nearby Purkinje  
740 Cells. *J Neurophysiol* 35, 155-169.  
741

742 Blenkinsop TA & Lang EJ. (2006). Block of inferior olive gap junctional coupling decreases  
743 Purkinje cell complex spike synchrony and rhythmicity. *J Neurosci* 26, 1739-1748.  
744

745 Bloedel JR & Ebner TJ. (1984). Rhythmic discharge of climbing fibre afferents in response to  
746 natural peripheral stimuli in the cat. *J Physiol* 352, 129-146.  
747

748 Bosman LWJ, Houweling AR, Owens CB, Tanke N, Shevchouk OT, Rahmati N, Teunissen  
749 WHT, Ju C, Gong W, Koekkoek SKE & De Zeeuw CI. (2011). Anatomical pathways  
750 involved in generating and sensing rhythmic whisker movements. *Front Integr Neurosci* 5, 53.  
751

752 Bosman LWJ, Koekkoek SKE, Shapiro J, Rijken BFM, Zandstra F, van der Ende B, Owens  
753 CB, Potters JW, de Gruijl JR, Ruigrok TJH & De Zeeuw CI. (2010). Encoding of whisker  
754 input by cerebellar Purkinje cells. *J Physiol* 588, 3757-3783.  
755

756 Brown IE & Bower JM. (2002). The influence of somatosensory cortex on climbing fiber  
757 responses in the lateral hemispheres of the rat cerebellum after peripheral tactile stimulation. *J*  
758 *Neurosci* 22, 6819-6829.  
759

760 Campolattaro MM, Buss EW & Freeman JH. (2015). Cross-modal savings in the contralateral  
761 eyelid conditioned response. *Behav Neurosci* 129, 683-691.  
762

763 Campolattaro MM & Freeman JH. (2009). Cerebellar inactivation impairs cross modal  
764 savings of eyeblink conditioning. *Behav Neurosci* 123, 292-302.  
765

766 Castelfranco AM, Robertson LT & McCollum G. (1994). Detail, proportion, and foci among  
767 face receptive fields of climbing fiber responses in the cat cerebellum. *Somatosens Mot Res*  
768 11, 27-46.  
769

770 Cerminara NL, Lang EJ, Sillitoe RV & Apps R. (2015). Redefining the cerebellar cortex as an  
771 assembly of non-uniform Purkinje cell microcircuits. *Nat Rev Neurosci* 16, 79-93.  
772

773 Chaplan SR, Bach FW, Pogrel JW, Chung JM & Yaksh TL. (1994). Quantitative assessment  
774 of tactile allodynia in the rat paw. *J Neurosci Methods* 53, 55-63.  
775

776 Chaumont J, Guyon N, Valera AM, Dugué GP, Popa D, Marcaggi P, Gautheron V, Reibel-  
777 Foisset S, Dieudonné S, Stephan A, Barrot M, Cassel JC, Dupont JL, Doussau F, Poulain B,  
778 Selimi F, Léna C & Isope P. (2013). Clusters of cerebellar Purkinje cells control their afferent  
779 climbing fiber discharge. *Proc Natl Acad Sci U S A* 110, 16223-16228.  
780

781 Chen X, Kovalchuk Y, Adelsberger H, Henning HA, Sausbier M, Wietzorrek G, Ruth P,  
782 Yarom Y & Konnerth A. (2010). Disruption of the olivo-cerebellar circuit by Purkinje  
783 neuron-specific ablation of BK channels. *Proc Natl Acad Sci U S A* 107, 12323-12328.  
784  
785 Coesmans M, Weber JT, De Zeeuw CI & Hansel C. (2004). Bidirectional parallel fiber  
786 plasticity in the cerebellum under climbing fiber control. *Neuron* 44, 691-700.  
787  
788 Das S, Weiss C & Disterhoft JF. (2001). Eyeblink conditioning in the rabbit (*Oryctolagus*  
789 *cuniculus*) with stimulation of the mystacial vibrissae as a conditioned stimulus. *Behav*  
790 *Neurosci* 115, 731-736.  
791  
792 De Gruijl JR, Bosman LWJ, De Zeeuw CI & De Jeu MTG. (2013). Inferior olive: All ins and  
793 outs. In *Handbook of the Cerebellum and Cerebellar Disorders*, ed. Manto M, Schmammann  
794 JD, Rossi F, Gruol DL & Koibuchi N, pp. 1013-1058. Springer Netherlands, Dordrecht.  
795  
796 De Gruijl JR, Hoogland TM & De Zeeuw CI. (2014). Behavioral correlates of complex spike  
797 synchrony in cerebellar microzones. *J Neurosci* 34, 8937-8944.  
798  
799 De Zeeuw CI, Hoebeek FE, Bosman LWJ, Schonewille M, Witter L & Koekkoek SK. (2011).  
800 Spatiotemporal firing patterns in the cerebellum. *Nat Rev Neurosci* 12, 327-344.  
801  
802 De Zeeuw CI, Holstege JC, Ruigrok TJ & Voogd J. (1989). Ultrastructural study of the  
803 GABAergic, cerebellar, and mesodiencephalic innervation of the cat medial accessory olive:  
804 anterograde tracing combined with immunocytochemistry. *J Comp Neurol* 284, 12-35.  
805

806 De Zeeuw CI, Holstege JC, Ruigrok TJH & Voogd J. (1990). Mesodiencephalic and  
807 cerebellar terminals terminate upon the same dendritic spines in the glomeruli of the cat and  
808 rat inferior olive: an ultrastructural study using a combination of [<sup>3</sup>H]leucine and wheat germ  
809 agglutinin coupled horseradish peroxidase anterograde tracing. *Neuroscience* 34, 645-655.  
810  
811 De Zeeuw CI, Simpson JJ, Hoogenraad CC, Galjart N, Koekkoek SKE & Ruigrok TJH.  
812 (1998). Microcircuitry and function of the inferior olive. *Trends Neurosci* 21, 391-400.  
813  
814 De Zeeuw CI & Ten Brinke MM. (2015). Motor learning and the cerebellum. *Cold Spring*  
815 *Harb Perspect Biol* 7, a021683.  
816  
817 Devor A & Yarom Y. (2002). Electrotonic coupling in the inferior olivary nucleus revealed  
818 by simultaneous double patch recordings. *J Neurophysiol* 87, 3048-3058.  
819  
820 Eccles JC, Sabah NH, Schmidt RF & Táboríková H. (1972). Cutaneous mechanoreceptors  
821 influencing impulse discharges in cerebellar cortex. III. In Purkyně cells by climbing fiber  
822 input. *Exp Brain Res* 15, 484-497.  
823  
824 Ekerot CF, Garwicz M & Schouenborg J. (1991). Topography and nociceptive receptive  
825 fields of climbing fibres projecting to the cerebellar anterior lobe in the cat. *J Physiol* 441,  
826 257-274.  
827  
828 Galvez R, Weiss C, Weible AP & Disterhoft JF. (2006). Vibrissa-signaled eyeblink  
829 conditioning induces somatosensory cortical plasticity. *J Neurosci* 26, 6062-6068.  
830

- 831 Gao W, Chen G, Reinert KC & Ebner TJ. (2006). Cerebellar cortical molecular layer  
832 inhibition is organized in parasagittal zones. *J Neurosci* 26, 8377-8387.  
833
- 834 Gao Z, Van Beugen BJ & De Zeeuw CI. (2012). Distributed synergistic plasticity and  
835 cerebellar learning. *Nat Rev Neurosci* 13, 619-635.  
836
- 837 Gibson AR, Horn KM & Pong M. (2004). Activation of climbing fibers. *Cerebellum* 3, 212-  
838 221.  
839
- 840 Groenewegen HJ, Voogd J & Freedman SL. (1979). The parasagittal zonation within the  
841 olivocerebellar projection. II. Climbing fiber distribution in the intermediate and hemispheric  
842 parts of cat cerebellum. *J Comp Neurol* 183, 551-601.  
843
- 844 Halverson HE, Khilkevich A & Mauk MD. (2015). Relating cerebellar Purkinje cell activity  
845 to the timing and amplitude of conditioned eyelid responses. *J Neurosci* 35, 7813-7832.  
846
- 847 Harvey RJ & Napper RMA. (1991). Quantitative studies on the mammalian cerebellum. *Prog*  
848 *Neurobiol* 36, 437-463.  
849
- 850 Heffley W, Song EY, Xu Z, Taylor BN, Hughes MA, McKinney A, Joshua M & Hull C.  
851 (2018). Coordinated cerebellar climbing fiber activity signals learned sensorimotor  
852 predictions. *Nat Neurosci* 21, 1431-1441.  
853
- 854 Herzfeld DJ, Kojima Y, Soetedjo R & Shadmehr R. (2018). Encoding of error and learning to  
855 correct that error by the Purkinje cells of the cerebellum. *Nat Neurosci* 21, 736-743.

856

857 Hilgard ER & Marquis DG. (1936). Conditioned eyelid responses in monkeys, with a  
858 comparison of dog, monkey, and man. *Psychol Monogr* 47, 186-198.

859

860 Hoogland TM, De Gruijl JR, Witter L, Canto CB & De Zeeuw CI. (2015). Role of  
861 synchronous activation of cerebellar Purkinje cell ensembles in multi-joint movement control.  
862 *Curr Biol* 25, 1157-1165.

863

864 Ito M. (2003). Long-term depression. *Annu Rev Neurosci* 12, 85-102.

865

866 Ito M. (2013). Error detection and representation in the olivo-cerebellar system. *Front Neural*  
867 *Circuits* 7, 1.

868

869 Ito M & Kano M. (1982). Long-lasting depression of parallel fiber-Purkinje cell transmission  
870 induced by conjunctive stimulation of parallel fibers and climbing fibers in the cerebellar  
871 cortex. *Neurosci Lett* 33, 253-258.

872

873 Junker M, Endres D, Sun ZP, Dicke PW, Giese M & Thier P. (2018). Learning from the past:  
874 A reverberation of past errors in the cerebellar climbing fiber signal. *PLoS Biol* 16, e2004344.

875

876 Kehoe EJ & Holt PE. (1984). Transfer across CS-US intervals and sensory modalities in  
877 classical conditioning of the rabbit. *Animal Learning & Behavior* 12, 122-128.

878

879 Khosrovani S, Van Der Giessen RS, De Zeeuw CI & De Jeu MTG. (2007). In vivo mouse  
880 inferior olive neurons exhibit heterogeneous subthreshold oscillations and spiking patterns.  
881 Proc Natl Acad Sci U S A 104, 15911-15916.  
882  
883 Kitazawa S, Kimura T & Yin PB. (1998). Cerebellar complex spikes encode both destinations  
884 and errors in arm movements. Nature 392, 494-497.  
885  
886 Kubo R, Aiba A & Hashimoto K. (2018). The anatomical pathway from the mesodiencephalic  
887 junction to the inferior olive relays perioral sensory signals to the cerebellum in the mouse. J  
888 Physiol.  
889  
890 Lang EJ, Sugihara I, Welsh JP & Llinás R. (1999). Patterns of spontaneous purkinje cell  
891 complex spike activity in the awake rat. J Neurosci 19, 2728-2739.  
892  
893 Leicht R, Rowe MJ & Schmidt RF. (1973). Cortical and peripheral modification of cerebellar  
894 climbing fibre activity arising from cutaneous mechanoreceptors. J Physiol 228, 619-635.  
895  
896 Lim CCT & Lim SA. (2009). Pendular nystagmus and palatomyoclonus from hypertrophic  
897 olivary degeneration. New Engl J Med 360, e12.  
898  
899 Llinás R & Volkind RA. (1973). The olivo-cerebellar system: functional properties as  
900 revealed by harmaline-induced tremor. Exp Brain Res 18, 69-87.  
901  
902 Llinás R, Walton K, Hillman DE & Sotelo C. (1975). Inferior olive: its role in motor learning.  
903 Science 190, 1230-1231.



904

905 Lock JT, Parker I & Smith IF. (2015). A comparison of fluorescent Ca<sup>2+</sup> indicators for  
906 imaging local Ca<sup>2+</sup> signals in cultured cells. *Cell Calcium* 58, 638-648.

907

908 Mathy A, Clark BA & Häusser M. (2014). Synaptically induced long-term modulation of  
909 electrical coupling in the inferior olive. *Neuron* 81, 1290-1296.

910

911 McCormick DA & Thompson RF. (1984). Cerebellum: essential involvement in the  
912 classically conditioned eyelid response. *Science* 223, 296-299.

913

914 Miles TS & Wiesendanger M. (1975). Organization of climbing fibre projections to the  
915 cerebellar cortex from trigeminal cutaneous afferents and from the SI face area of the cerebral  
916 cortex in the cat. *J Physiol* 245, 409-424.

917

918 Montarolo PG, Palestini M & Strata P. (1982). The inhibitory effect of the olivocerebellar  
919 input on the cerebellar Purkinje cells in the rat. *J Physiol* 332, 187-202.

920

921 Mukamel EA, Nimmerjahn A & Schnitzer MJ. (2009). Automated analysis of cellular signals  
922 from large-scale calcium imaging data. *Neuron* 63, 747-760.

923

924 Najafi F, Giovannucci A, Wang SSH & Medina JF. (2014). Coding of stimulus strength via  
925 analog calcium signals in Purkinje cell dendrites of awake mice. *eLIFE* 3, e03663.

926

927 Negrello M, Warnaar P, Romano V, Owens CB, Lindeman S, Iavarona E, Spanke JK,  
928 Bosman LWJ & De Zeeuw CI. (2018). Aperiodic rhythms of the inferior olive. bioRxiv,  
929 408112.  
930  
931 Ohmae S & Medina JF. (2015). Climbing fibers encode a temporal-difference prediction error  
932 during cerebellar learning in mice. *Nat Neurosci* 18, 1798-1803.  
933  
934 Oscarsson O. (1969). Termination and functional organization of the dorsal spino-  
935 olivocerebellar path. *J Physiol* 200, 129-149.  
936  
937 Ozden I, Dombeck DA, Hoogland TM, Tank DW & Wang SS. (2012). Widespread state-  
938 dependent shifts in cerebellar activity in locomoting mice. *PLoS One* 7, e42650.  
939  
940 Ozden I, Lee HM, Sullivan MR & Wang SSH. (2008). Identification and clustering of event  
941 patterns from in vivo multiphoton optical recordings of neuronal ensembles. *J Neurophysiol*  
942 100, 495-503.  
943  
944 Ozden I, Sullivan MR, Lee HM & Wang SSH. (2009). Reliable coding emerges from  
945 coactivation of climbing fibers in microbands of cerebellar Purkinje neurons. *J Neurosci* 29,  
946 10463-10473.  
947  
948 Person AL & Raman IM. (2011). Purkinje neuron synchrony elicits time-locked spiking in the  
949 cerebellar nuclei. *Nature* 481, 502-505.  
950

951 Rahmati N, Owens CB, Bosman LWJ, Spanke JK, Lindeman S, Gong W, Potters JW,  
952 Romano V, Voges K, Moscato L, Koekkoek SKE, Negrello M & De Zeeuw CI. (2014).  
953 Cerebellar potentiation and learning a whisker-based object localization task with a time  
954 response window. *J Neurosci* 34, 1949-1962.  
955  
956 Romano V, De Propris L, Bosman LWJ, Warnaar P, ten Brinke MM, Lindeman S, Ju C,  
957 Velauthapillai A, Spanke JK, Middendorp Guerra E, Hoogland TM, Negrello M, D'Angelo E  
958 & De Zeeuw CI. (2018). Potentiation of cerebellar Purkinje cells facilitates whisker reflex  
959 adaptation through increased simple spike activity. *eLife* 7, e38852.  
960  
961 Roome CJ & Kuhn B. (2018). Simultaneous dendritic voltage and calcium imaging and  
962 somatic recording from Purkinje neurons in awake mice. *Nat Commun* 9, 3388.  
963  
964 Ruigrok TJH. (2011). Ins and outs of cerebellar modules. *Cerebellum* 10, 464-474.  
965  
966 Ruigrok TJH, de Zeeuw CI, van der Burg J & Voogd J. (1990). Intracellular labeling of  
967 neurons in the medial accessory olive of the cat: I. Physiology and light microscopy. *J Comp*  
968 *Neurol* 300, 462-477.  
969  
970 Rushmer DS, Woollacott MH, Robertson LT & Laxer KD. (1980). Somatotopic organization  
971 of climbing fiber projections from low threshold cutaneous afferents to pars intermedia of  
972 cerebellar cortex in the cat. *Brain Res* 181, 17-30.  
973

- 974 Samuel M, Torun N, Tuite PJ, Sharpe JA & Lang AE. (2004). Progressive ataxia and palatal  
975 tremor (PAPT): clinical and MRI assessment with review of palatal tremors. *Brain* 127, 1252-  
976 1268.
- 977
- 978 Sasaki K, Bower JM & Llinás R. (1989). Multiple Purkinje cell recording in rodent cerebellar  
979 cortex. *Eur J Neurosci* 1, 572-586.
- 980
- 981 Schultz SR, Kitamura K, Post-Uiterweer A, Krupic J & Häusser M. (2009). Spatial pattern  
982 coding of sensory information by climbing fiber-evoked calcium signals in networks of  
983 neighboring cerebellar Purkinje cells. *J Neurosci* 29, 8005-8015.
- 984
- 985 Shambes GM, Gibson JM & Welker W. (1978). Fractured somatotopy in granule cell tactile  
986 areas of rat cerebellar hemispheres revealed by micromapping. *Brain Behav Evol* 15, 94-140.
- 987
- 988 Simpson JJ, Wylie DR & De Zeeuw CI. (1996). On climbing fiber signals and their  
989 consequence(s). *Behav Brain Sci* 19, 384-398.
- 990
- 991 Snider RS & Stowell A. (1944). Receiving areas of the tactile, auditory and visual system in  
992 the cerebellum. *J Neurophysiol* 7, 331-357.
- 993
- 994 Sotelo C, Llinás R & Baker R. (1974). Structural study of inferior olivary nucleus of the cat:  
995 morphological correlates of electrotonic coupling. *J Neurophysiol* 37, 541-559.
- 996
- 997 Stosiek C, Garaschuk O, Holthoff K & Konnerth A. (2003). In vivo two-photon calcium  
998 imaging of neuronal networks. *Proc Natl Acad Sci U S A* 100, 7319-7324.

999

1000 Streng ML, Popa LS & Ebner TJ. (2017). Climbing fibers control Purkinje cell

1001 representations of behavior. *J Neurosci* 37, 1997-2009.

1002

1003 Sugihara I, Fujita H, Na J, Quy PN, Li BY & Ikeda D. (2009). Projection of reconstructed

1004 single Purkinje cell axons in relation to the cortical and nuclear aldolase C compartments of

1005 the rat cerebellum. *J Comp Neurol* 512, 282-304.

1006

1007 Sugihara I, Marshall SP & Lang EJ. (2007). Relationship of complex spike synchrony bands

1008 and climbing fiber projection determined by reference to aldolase C compartments in crus IIa

1009 of the rat cerebellar cortex. *J Comp Neurol* 501, 13-29.

1010

1011 Sugihara I, Wu H & Shinoda Y. (1999). Morphology of single olivocerebellar axons labeled

1012 with biotinylated dextran amine in the rat. *J Comp Neurol* 414, 131-148.

1013

1014 Sugihara I, Wu HS & Shinoda Y. (2001). The entire trajectories of single olivocerebellar

1015 axons in the cerebellar cortex and their contribution to cerebellar compartmentalization. *J*

1016 *Neurosci* 21, 7715-7723.

1017

1018 Sullivan MR, Nimmerjahn A, Sarkisov DV, Helmchen F & Wang SSH. (2005). In vivo

1019 calcium imaging of circuit activity in cerebellar cortex. *J Neurophysiol* 94, 1636-1644.

1020

1021 Suvrathan A, Payne HL & Raymond JL. (2016). Timing rules for synaptic plasticity matched

1022 to behavioral function. *Neuron* 92, 959-967.

1023

- 1024 Szentágothai J. (1965). The use of degeneration methods in the investigation of short neuronal  
1025 connexions. *Prog Brain Res* 14, 1-32.  
1026
- 1027 Tada M, Takeuchi A, Hashizume M, Kitamura K & Kano M. (2014). A highly sensitive  
1028 fluorescent indicator dye for calcium imaging of neural activity in vitro and in vivo. *Eur J*  
1029 *Neurosci* 39, 1720-1728.  
1030
- 1031 Ten Brinke MM, Boele HJ & De Zeeuw CI. (2019). Conditioned climbing fiber responses in  
1032 cerebellar cortex and nuclei. *Neurosci Lett* 688, 26-36.  
1033
- 1034 Ten Brinke MM, Boele HJ, Spanke JK, Potters JW, Kornysheva K, Wulff P, IJpelaar ACHG,  
1035 Koekkoek SKE & De Zeeuw CI. (2015). Evolving models of Pavlovian conditioning:  
1036 cerebellar cortical dynamics in awake behaving mice. *Cell Rep* 13, 1977-1988.  
1037
- 1038 Thach WT, Jr. (1967). Somatosensory receptive fields of single units in cat cerebellar cortex.  
1039 *J Neurophysiol* 30, 675-696.  
1040
- 1041 Tsutsumi S, Yamazaki M, Miyazaki T, Watanabe M, Sakimura K, Kano M & Kitamura K.  
1042 (2015). Structure-function relationships between aldolase C/zebrin II expression and complex  
1043 spike synchrony in the cerebellum. *J Neurosci* 35, 843-852.  
1044
- 1045 Van Der Giessen RS, Koekkoek SK, van Dorp S, De Gruijl JR, Cupido A, Khosrovani S,  
1046 Dortland B, Wellershaus K, Degen J, Deuchars J, Fuchs EC, Monyer H, Willecke K, De Jeu  
1047 MTG & De Zeeuw CI. (2008). Role of olivary electrical coupling in cerebellar motor  
1048 learning. *Neuron* 58, 599-612.

1049

1050 Voges K, Wu B, Post L, Schonewille M & De Zeeuw CI. (2017). Mechanisms underlying  
1051 vestibulo-cerebellar motor learning in mice depend on movement direction. *J Physiol* 595,  
1052 5301-5326.

1053

1054 Voogd J & Glickstein M. (1998). The anatomy of the cerebellum. *Trends Neurosci* 21, 370-  
1055 375.

1056

1057 Wang JJ, Kim JH & Ebner TJ. (1987). Climbing fiber afferent modulation during a visually  
1058 guided, multi-joint arm movement in the monkey. *Brain Res* 410, 323-329.

1059

1060 Welsh JP, Ahn ES & Placantonakis DG. (2005). Is autism due to brain desynchronization? *Int*  
1061 *J Dev Neurosci* 23, 253-263.

1062

1063 Welsh JP, Lang EJ, Suglhara I & Llinas R. (1995). Dynamic organization of motor control  
1064 within the olivocerebellar system. *Nature* 374, 453-457.

1065

1066 Witter L, Canto CB, Hoogland TM, de Gruijl JR & De Zeeuw CI. (2013). Strength and timing  
1067 of motor responses mediated by rebound firing in the cerebellar nuclei after Purkinje cell  
1068 activation. *Front Neural Circuits* 7, 133.

1069

1070 Wylie DR, De Zeeuw CI & Simpson JI. (1995). Temporal relations of the complex spike  
1071 activity of Purkinje cell pairs in the vestibulocerebellum of rabbits. *J Neurosci* 15, 2875-2887.

1072

- 1073 Xiao J, Cerminara NL, Kotsurovskyy Y, Aoki H, Burroughs A, Wise AK, Luo Y, Marshall  
1074 SP, Sugihara I, Apps R & Lang EJ. (2014). Systematic regional variations in Purkinje cell  
1075 spiking patterns. PLoS One 9, e105633.  
1076  
1077 Yang Y & Lisberger SG. (2014). Purkinje-cell plasticity and cerebellar motor learning are  
1078 graded by complex-spike duration. Nature 510, 529-532.  
1079  
1080 Yatim N, Billig I, Compoin C, Buisseret P & Buisseret-Delmas C. (1996).  
1081 Trigemino-cerebellar and trigemino-olivary projections in rats. Neurosci Res 25, 267-283.  
1082  
1083 Zhou H, Lin Z, Voges K, Ju C, Gao Z, Bosman LWJ, Ruigrok TJH, Hoebeek FE, De Zeeuw  
1084 CI & Schonewille M. (2014). Cerebellar modules operate at different frequencies. eLIFE 3,  
1085 e02536.



## **Additional information**

### 1086 *Competing interests*

1087 The authors declare that there are no competing interests.

1088

### 1089 *Author contributions*

1090 All experiments were performed at the Department of Neuroscience of the Erasmus MC,  
1091 Rotterdam, The Netherlands. The experiments were designed by C.J., L.W.J.B., T.M.H.,  
1092 P.M., M.N. and C.I.D.Z., performed by C.J. and P.M. and analysed by all authors. The  
1093 manuscript was written by C.J., L.W.J.B., T.M.H., M.N. and C.I.D.Z. with contributions from  
1094 all authors. All authors have approved the final version of the manuscript and ensure the  
1095 accuracy and integrity of the data presented. All persons with a significant contribution to this  
1096 study are listed as authors.

1097

### 1098 *Funding*

1099 Financial support was provided by the Netherlands Organization for Scientific Research  
1100 (NWO-ALW; C.I.D.Z.), the Dutch Organization for Medical Sciences (ZonMW; C.I.D.Z.),  
1101 Life Sciences (C.I.D.Z.), ERC-adv and ERC-POC (C.I.D.Z.) and the China Scholarship  
1102 Council (No. 2010623033; C.J.). The funders had no role in study design, data collection and  
1103 analysis, decision to publish, or preparation of the manuscript.

1104

### 1105 *Acknowledgements*

1106 The authors wish to thank A.C.H.G. Ijpelaar for technical assistance and Dr. M. Schonewille  
1107 for help with recording ocular movements during stimulation.

1108 **Tables**

1109 **Table 1**

| Stimulation | Responsive cells |    | Response parameters |              | Significance ( <i>p</i> )                           |              |              |              |              |
|-------------|------------------|----|---------------------|--------------|-----------------------------------------------------|--------------|--------------|--------------|--------------|
|             | No.              | %  | Peak (Hz)           | Latency (ms) | UL                                                  | LL           | Ch           | SO           | LED          |
|             |                  |    |                     |              | $\chi^2 = 25.758$ ; <i>df</i> = 5; <i>p</i> = 0.001 |              |              |              |              |
| Whisker pad | 111 (282)        | 39 | 2.12 ± 0.82         | 84±42        | <b>0.010</b>                                        | 0.661        | <b>0.003</b> | <b>0.000</b> | 0.828        |
| Upper lip   | 71 (249)         | 29 | 1.89 ± 0.67         | 84±84        |                                                     | <b>0.031</b> | 0.597        | 0.157        | 0.064        |
| Lower lip   | 99 (264)         | 38 | 2.23 ± 0.97         | 84±42        |                                                     |              | <b>0.010</b> | <b>0.001</b> | 1.000        |
| Cheek       | 53 (203)         | 26 | 2.30 ± 1.67         | 84±42        |                                                     |              |              | 0.415        | <b>0.028</b> |
| Sound only  | 44 (197)         | 22 | 1.74 ± 0.65         | 84±84        |                                                     |              |              |              | <b>0.003</b> |
| LED         | 49 (129)         | 34 | 2.13 ± 1.18         | 126±0        |                                                     |              |              |              |              |

1110

1111 **Table 1 – Purkinje cell responses to sensory stimulation in awake mice**

1112 Purkinje cells respond with complex firing to sensory stimulation (Fig. 4). For each type of  
1113 stimulation, the number and percentage of statistically significantly responsive cells (peak  
1114 response > average + 3 s.d. of baseline firing) is indicated (in brackets: total number of cells  
1115 tested). The response peak and response latency are indicated as medians ± inter-quartile  
1116 ranges. Some stimuli recruited more Purkinje cells with statistically significant responses than  
1117 others. The differences in fractions of responsive Purkinje cells were statistically significant  
1118 (6x2  $\chi^2$  test) and further tested using pair-wise Fisher's exact tests (as the  $\chi^2$  test was  
1119 significant, no further correction for multiple comparisons was applied). Bold numbers  
1120 indicate statistically significant values. UL = upper lip; LL = lower lip; Ch = cheek; SO =  
1121 sound only.

1122 **Table 2**

| Stimulation | Pearson correlation (R) |           |          |            |          |
|-------------|-------------------------|-----------|----------|------------|----------|
|             | Upper lip               | Lower lip | Cheek    | Sound only | LED      |
| Whisker pad | 0.272***                | 0.253***  | 0.166*   | 0.257*     | 0.358*** |
| Upper lip   |                         | 0.192**   | 0.189**  | 0.130      | 0.129    |
| Lower lip   |                         |           | 0.387*** | 0.513***   | 0.339*** |
| Cheek       |                         |           |          | 0.485***   | 0.362*** |
| Sound only  |                         |           |          |            | 0.523*** |

1123

1124 **Table 2 – Correlations between response probabilities**

1125 For each Purkinje cell, we made pair-wise comparisons of the Z scores of the amplitudes of  
1126 the responses to different stimuli. For each pair of stimuli, the Pearson correlation coefficient  
1127 (R) was calculated for the complete population of Purkinje cells subjected to that pair of  
1128 stimuli. The *p* values of these correlations underwent Benjamini-Hochberg correction for  
1129 multiple comparisons. These data are graphically represented in Fig. 5A. \* *p* < 0.05; \*\* *p* <  
1130 0.01; \*\*\* *p* < 0.001

1131 **Table 3**

| Stimulation | Difference from chance ( <i>Z</i> ) |           |       |            |        |
|-------------|-------------------------------------|-----------|-------|------------|--------|
|             | Upper lip                           | Lower lip | Cheek | Sound only | LED    |
| Whisker pad | 1.21                                | 1.25      | 0.85  | 1.34       | 2.75** |
| Upper lip   |                                     | 1.23      | 2.00* | 1.34       | 1.94   |
| Lower lip   |                                     |           | 2.39* | 2.70**     | 2.62** |
| Cheek       |                                     |           |       | 3.31**     | 3.10** |
| Sound only  |                                     |           |       |            | 2.28*  |

1132

1133 **Table 3 – Convergence of different sensory streams on individual Purkinje cells**

1134 For each type of stimulus, we compared the observed rate of convergence on individual

1135 Purkinje cells to chance level, using a bootstrap method based on the relative prevalence of

1136 responses to each stimulus (cf. Fig. 5). The difference from chance is indicated by *Z* values.

1137 All combinations occurred more often than expected ( $Z > 0$ ). The *p* values of these

1138 correlations underwent Benjamini-Hochberg correction for multiple comparisons. \*  $p < 0.05$ ;

1139 \*\*  $p < 0.01$

1140 **Table 4**

| Stimulation              | Difference from chance (Z) |
|--------------------------|----------------------------|
| <b>WP + UL + LL</b>      | 1.89                       |
| <b>WP + LL + Ch</b>      | 1.32                       |
| <b>UL + LL + Ch</b>      | 3.22**                     |
| <b>WP + UL + LL + Ch</b> | 3.07**                     |

1141

1142 **Table 4 – Convergence of different sensory streams on individual Purkinje cells**

1143 For each type of stimulus, we compared the observed rate of convergence on individual

1144 Purkinje cells to chance level, using a bootstrap method based on the relative prevalence of

1145 responses to each stimulus (cf. Fig. 5). The difference from chance is indicated by Z values.

1146 All combinations occurred more often than expected ( $Z > 0$ ). The  $p$  values of these

1147 correlations underwent Benjamini-Hochberg correction for multiple comparisons. \*  $p < 0.05$ ;

1148 \*\*  $p < 0.01$

1149 **Table 5**

| Whisker   | Responsive cells |    | Difference from chance (Z) |       |                 |                |
|-----------|------------------|----|----------------------------|-------|-----------------|----------------|
|           | No.              | %  | C1                         | C2    | C3              | D2             |
| <b>B2</b> | 15 (148)         | 10 | 0.630                      | 0.227 | <b>5.130***</b> | <b>2.052*</b>  |
| <b>C1</b> | 4 (148)          | 3  |                            | 0.803 | 0.782           | 0.630          |
| <b>C2</b> | 17 (148)         | 11 |                            |       | 0.222           | 0.208          |
| <b>C3</b> | 23 (148)         | 16 |                            |       |                 | <b>3.100**</b> |
| <b>D2</b> | 15 (148)         | 10 |                            |       |                 |                |

1150

1151 **Table 5 – Purkinje cell responses to single-whisker stimulation in anaesthetized mice**

1152 Purkinje cells respond with complex firing to single-whisker stimulation (cf. Fig. 10). For  
 1153 each whisker, the number and percentage of responsive cells is indicated (in brackets: total  
 1154 number of cells tested). For each whisker, we compared the observed rate of convergence on  
 1155 individual Purkinje cells to chance level, using a bootstrap methods based on the relative  
 1156 prevalence of each stimulus. Indicated are the Z values. All combinations occurred more often  
 1157 than expected ( $Z > 0$ ). Statistical significance is indicated after Benjamini-Hochberg  
 1158 correction for multiple comparisons. \*  $p < 0.05$ ; \*\*  $p < 0.01$ ; \*\*\*  $p < 0.001$

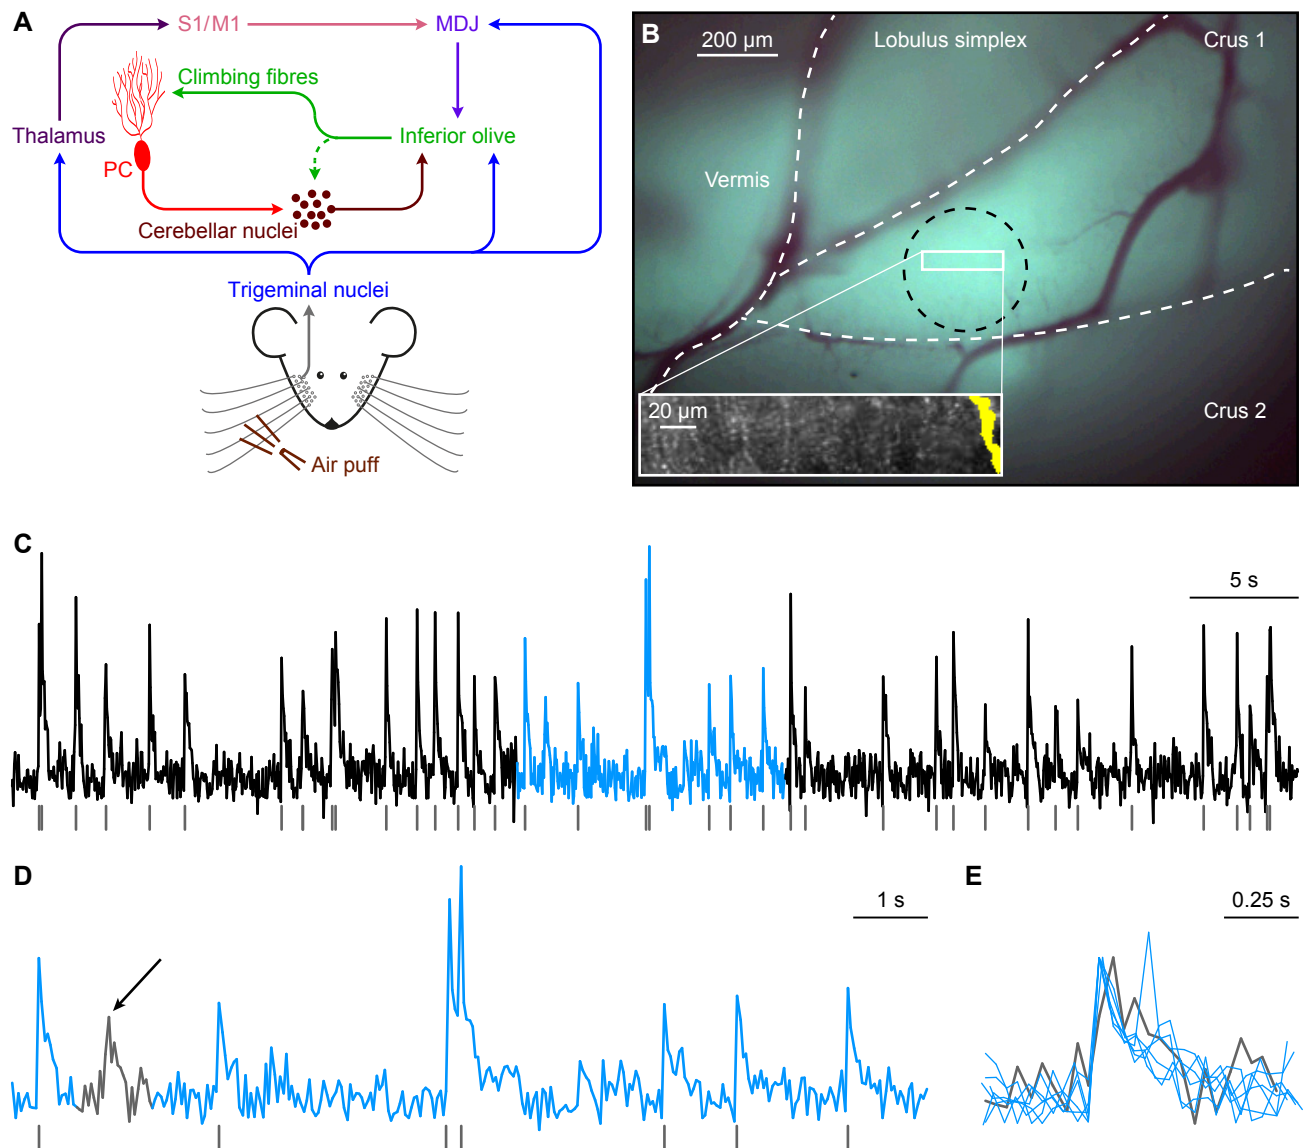

### Figure 1 – Sensory pathways carrying facial input to the cerebellar cortex

**(A)** Scheme of the main routes conveying facial tactile input via the climbing fibre pathway to cerebellar Purkinje cells (PC). Climbing fibres, which cause complex spike firing in Purkinje cells, exclusively originate from the inferior olive. The inferior olive, in turn, is directly innervated by neurons from the trigeminal nuclei as well as indirectly via thalamo-cortical pathways that project to the inferior olive mainly via the nuclei of the mesodiencephalic junction (MDJ). The MDJ itself also receives direct input from the trigeminal nuclei. See the main text for references. **(B)** *In vivo* two-photon  $Ca^{2+}$  imaging was performed to characterize Purkinje cell complex spike responses to sensory stimulation in the medial part of crus 1. Purkinje cells were detected using independent component analysis and the position of a Purkinje cell dendrite (yellow area on

the right) within a field of view is shown in the inset. At the end of each recording session, the brain was removed and the location of the dye injection in medial crus 1 was confirmed through *ex vivo* epifluorescent imaging (black circle). The white rectangle indicates the approximate recording location. **(C)** Complex spikes that were triggered by climbing fibre activity were retrieved from fluorescent traces of individual Purkinje cells. A representative trace obtained from the Purkinje cell dendrite illustrated in **B** is shown together with the detected complex spikes (grey lines). The light blue episode is enlarged in **D**. Complex spikes were detected by the combination of a threshold and a template matching algorithm. Only events with a sharp rising phase were accepted as complex spikes. In the 60 s interval shown in **C**, there was one event with a slower rise time (see arrow in **D**), as indicated at a larger time scale in **E**. The events in **E** are scaled to peak.

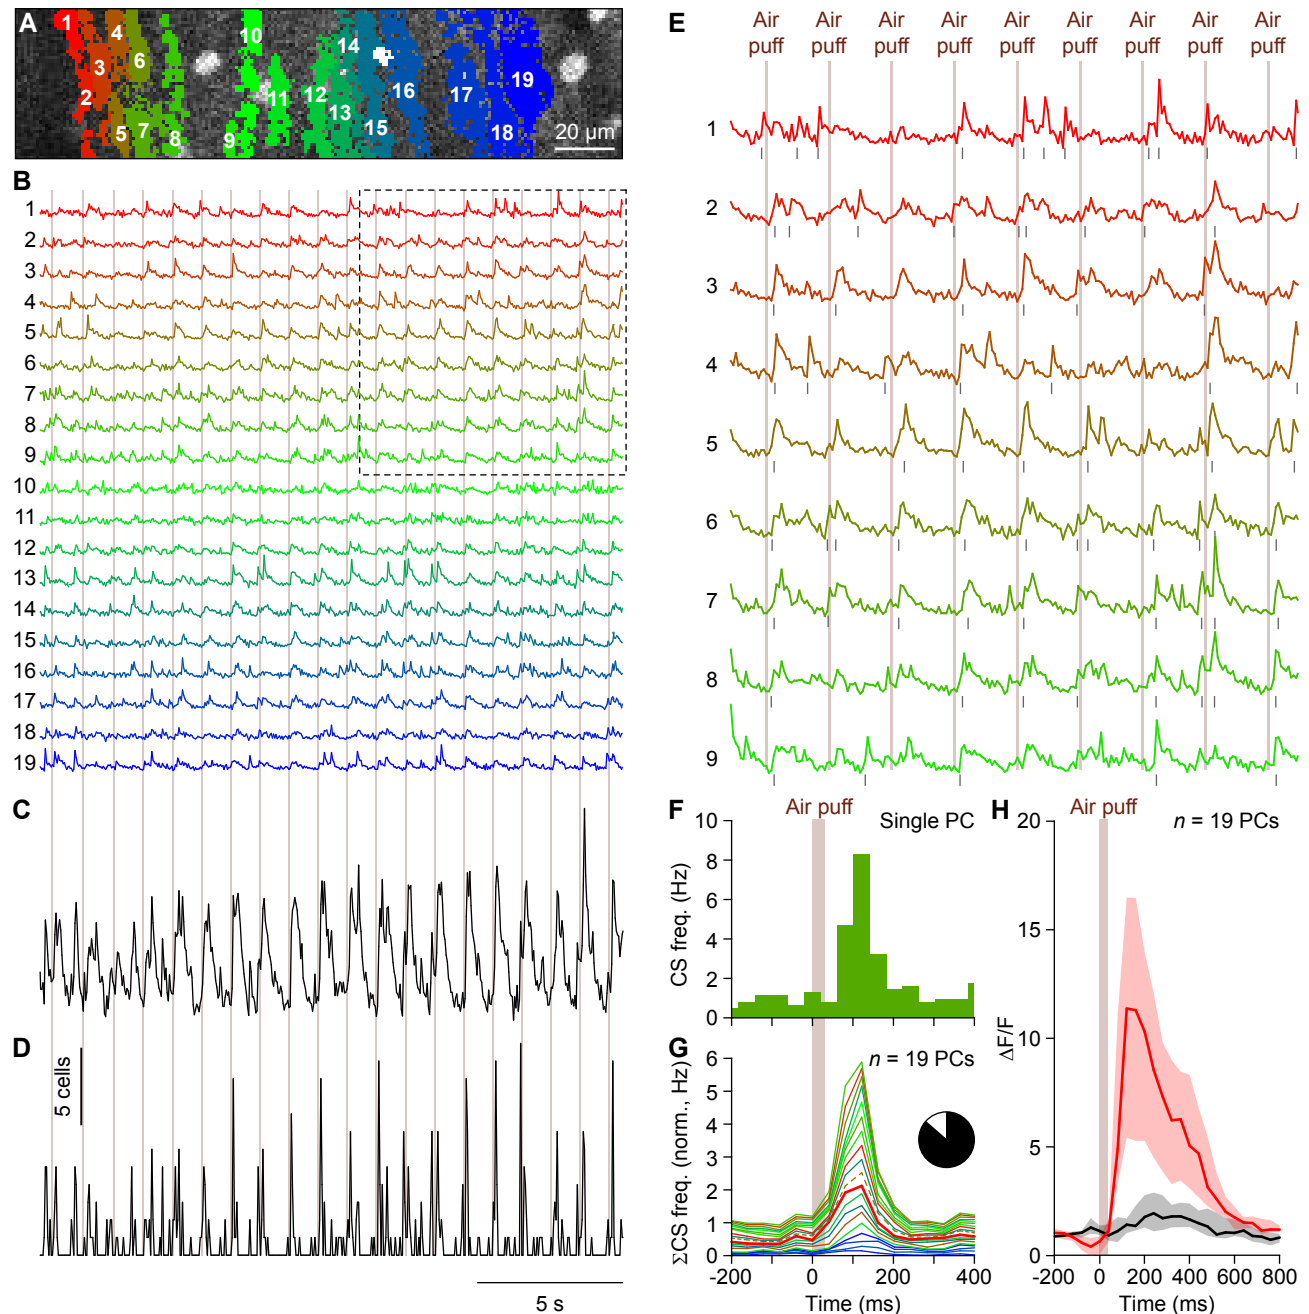

### Figure 2 - Whisker stimulation evokes complex spike responses in cerebellar crus 1

**(A)** Complex spikes elicit large increases in the  $\text{Ca}^{2+}$  concentration within Purkinje cell dendrites that can be resolved using *in vivo* two-photon microscopy in combination with a fluorescent  $\text{Ca}^{2+}$  indicator. An example of a field of view with 19 identified Purkinje cell dendrites located in the medial part of crus 1 is shown with each individual dendrite denoted by a number and a unique colour. This recording was made in an awake mouse. **(B)** The fluorescent traces of each of these dendrites show distinct  $\text{Ca}^{2+}$  transient events, which are to a large extent associated with air puff stimulation of the facial whiskers (times of stimulation indicated by the vertical lines). The boxed area is enlarged in **E**. **(C)** Summed fluorescence trace composed of all 19 individual traces emphasizing the participation of many Purkinje cells to the stimulus-triggered responses. **(D)** After complex spike extraction, a clear relation between stimulus and activity was observed as illustrated by summing, for each frame, the number of complex spikes observed over all dendrites. The vertical scale bar corresponds to the simultaneous activity of 5 Purkinje cells. **(E)** Enlargement of the boxed area in **B**. The air puffs were delivered once every second. **(F)** Peri-stimulus time histogram of a Purkinje cell dendrite

(marked as number 7 in **A** and **B**) in response to air puff stimulation to the ipsilateral whiskers (154 trials). The bin size (40 ms) corresponds to the acquisition frame rate (25 Hz). **(G)** Normalized stacked line graph of the Purkinje cells in this field of view showing that every cell contributed to the overall response. The Purkinje cells are ranked by their maximal response and the data are normalized so that the top line reflects the average frequency per bin. Cell no. 5 (dashed line) had a relatively poor signal-to-noise ratio during later parts of the recording (see Fig. 3), but it had nevertheless a complex spike response profile that was indistinguishable from the other cells. The colours match those in the panels **A-B**. Inset: In total, 102 out of 117 cells analysed (87%) were responsive to whisker air puff stimulation (peak response exceeded average + 3 s.d. of pre-stimulus interval). **(H)** Median fluorescent traces of the trials with (red) and without (black) complex spikes fired during the first 200 ms after air puff onset. In the absence of complex spike firing, only a very small increase in fluorescence was observed, indicating that the majority of change in fluorescence was associated with complex spike firing. Note the longer time scale than in **F** and **G**. The lines indicate the medians and the shaded areas the inter-quartile ranges of the 19 Purkinje cells in this field of view.



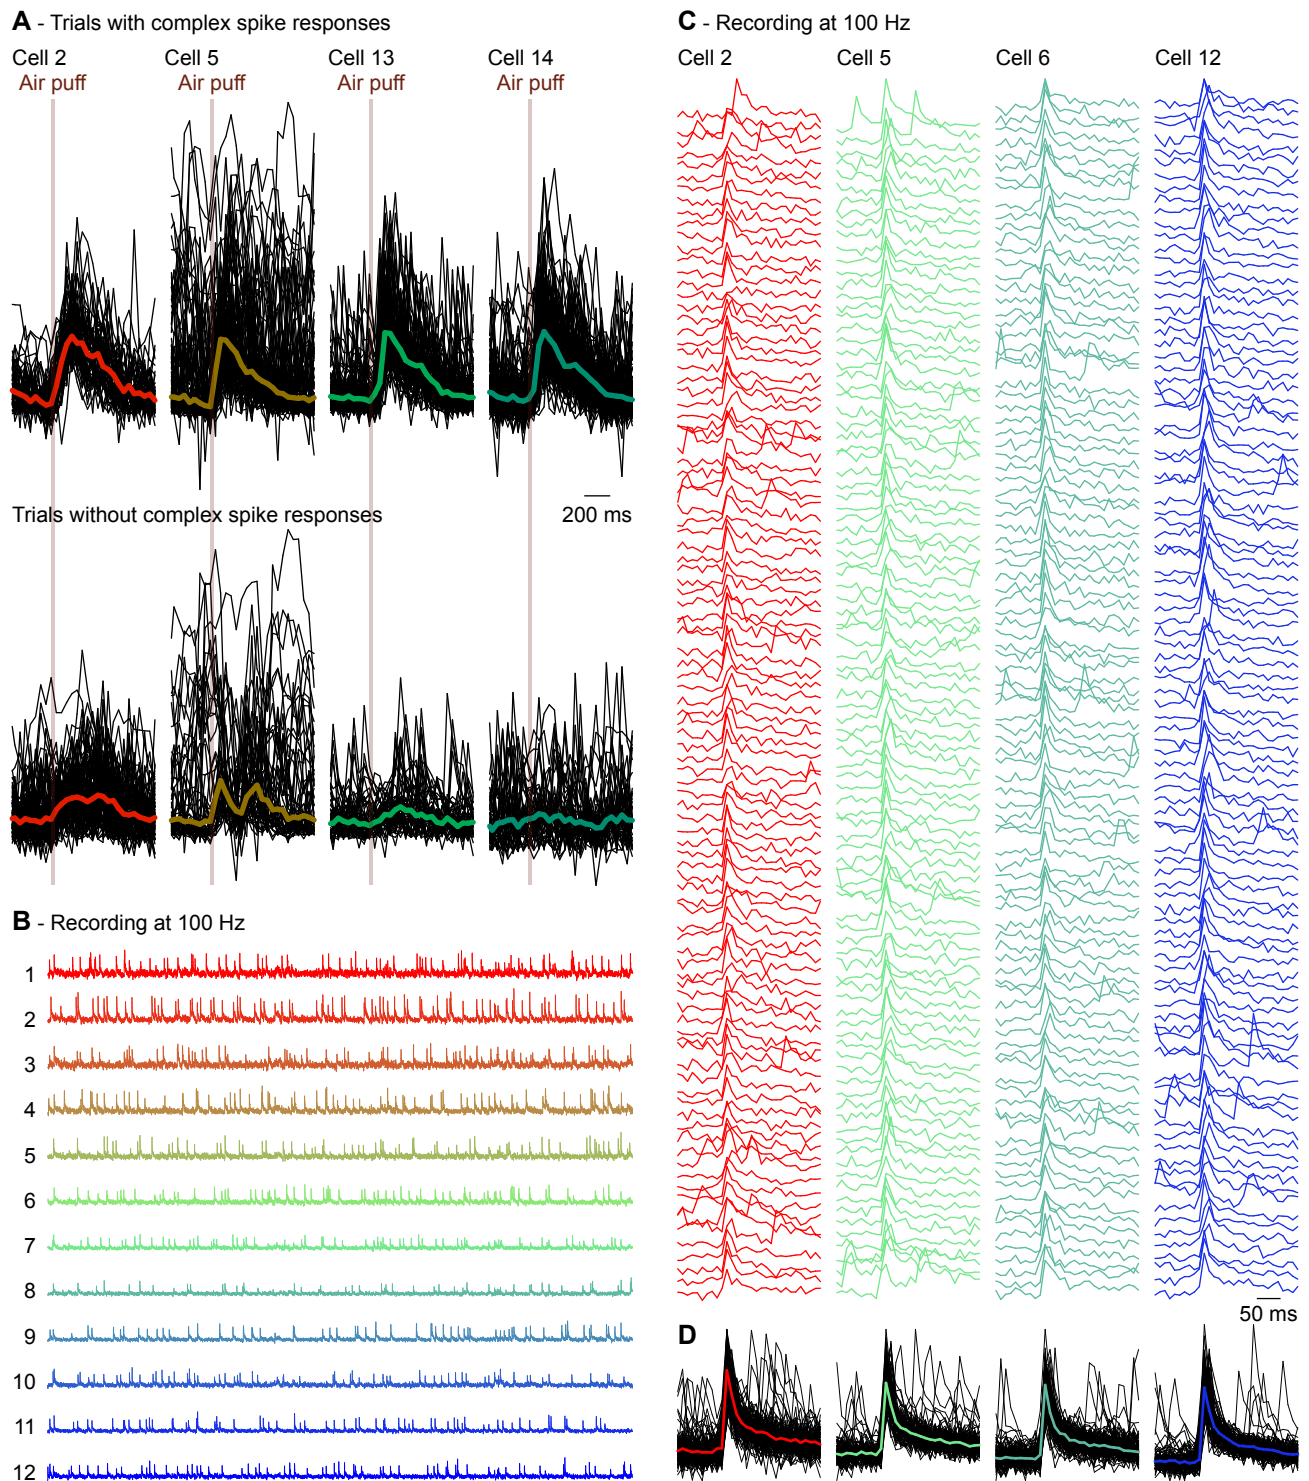

### Figure 3 - Complex spike detection

(A) Of the same experiment illustrated in Fig. 2, we randomly selected four Purkinje cells of which all trials with (top) and without (bottom) a complex spike within 200 ms of stimulus onset are shown. The signals are scaled to the maximum of the median complex spike responses. The fat coloured lines indicate the medians with the same colour code as in Fig. 2. Trials without a complex spike response can still show an increased fluorescence, but the kinetics of the non-complex spike response differed from those of the complex spike responses. Note that the raw trace of cell 5 had a period with increased noise levels, making it the least

reliable cell of this recording. Nevertheless, cell 5 had a complex spike response profile that was very similar to those of the other cells (see dashed line in Fig. 2G). Cells (in other recordings) that had a worse signal-to-noise ratio than cell 5 of this recording were excluded from analysis. (B) To have a better characterization of the rise times, we made recordings with a smaller field of view, but a higher temporal resolution (100 Hz). Shown are 60 s traces of 12 simultaneously recorded Purkinje cells. (C) Of four randomly selected Purkinje cells, the first 100 events were plotted and superimposed (D). The coloured lines in D indicate the medians. Virtually all events had a rise time of 10 or 20 ms (1 or 2 frames).

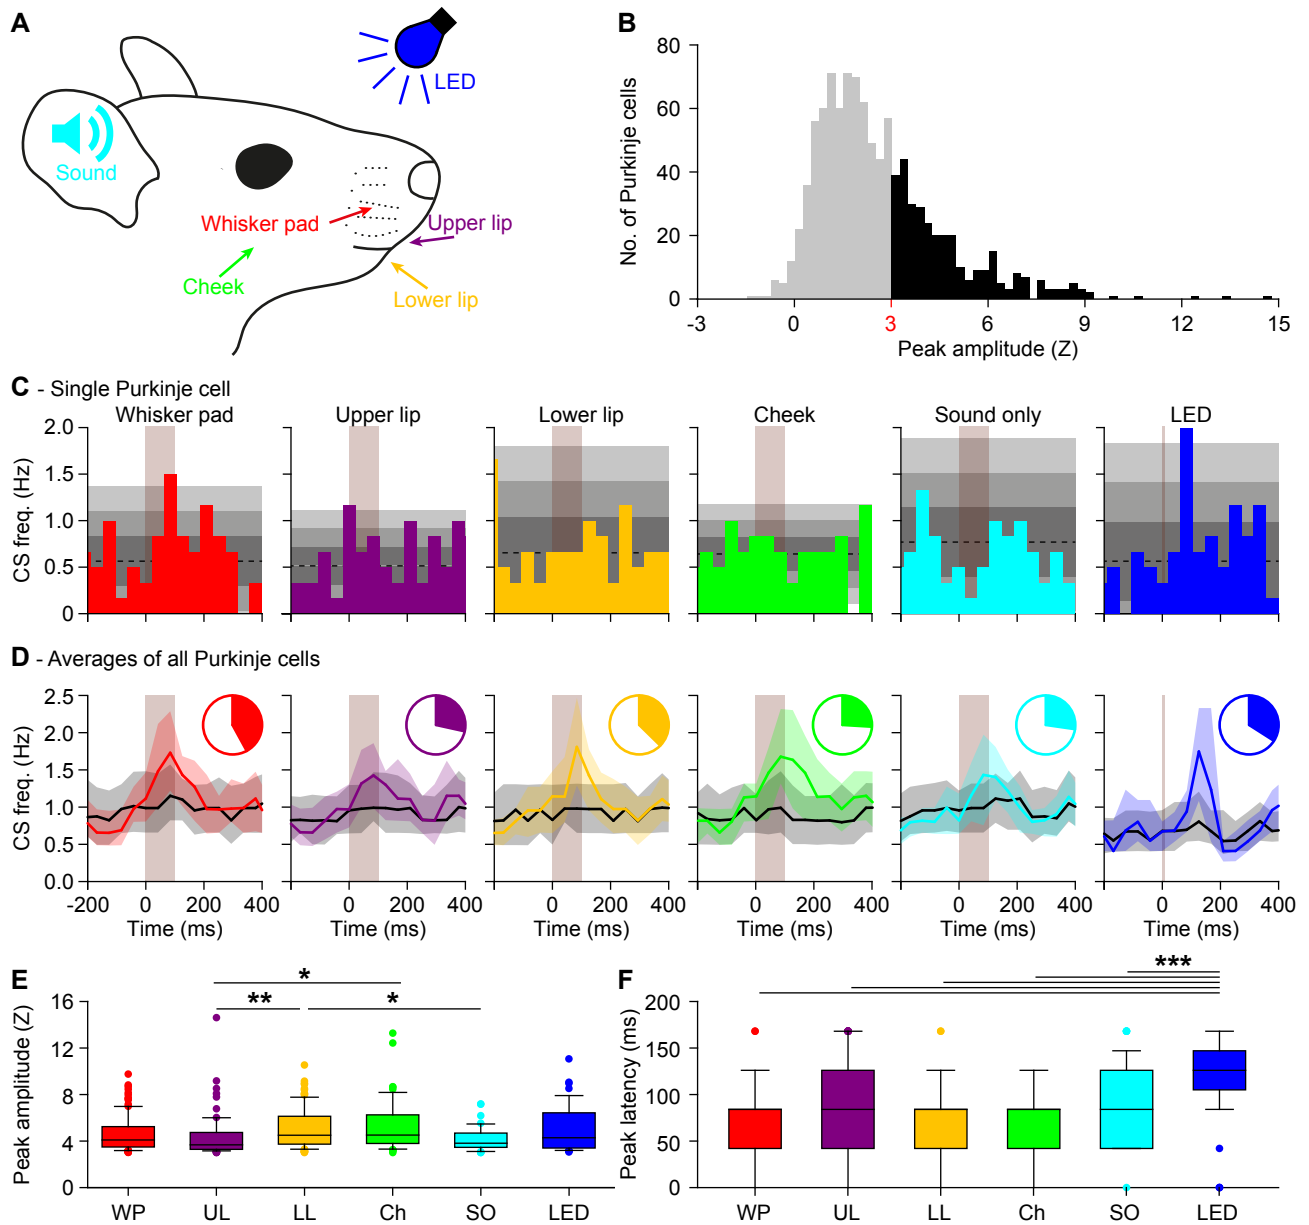

**Figure 4 – Purkinje cells in crus 1 respond to various types of sensory stimulation**

(A) Tactile stimuli were presented to four facial regions in awake mice: the whisker pad (WP), the upper lip (UL), the lower lip (LL) and the cheek (Ch). Each stimulus was delivered with a piezo-actuator that made a muted, yet audible sound which was also delivered without touch (“sound only (SO)”). A blue light flash generated by an LED was used as visual stimulus. These experiments were performed in awake mice. (B) To avoid interference of adjacent areas, we applied gentle touches (0.686 mN). The complex spike response ratio was much reduced relative to the strong air puff stimulation to all ipsilateral whiskers illustrated in Fig. 2. A histogram of the peak responses (expressed as Z value) of all responses to either of the four tactile stimuli demonstrates that the response strength is a continuum, showing the lack of a clear separation between “responsive” and “non-responsive” Purkinje cells (998 stimulus conditions in 282 Purkinje cells). We considered Purkinje cells that showed a peak response above  $Z = 3$  as “significantly responsive” (represented with black bars), but we provide most of the analyses also for the population as a whole

(e.g., Fig. 5). (C) The peri-stimulus time histograms (PSTHs) of a representative Purkinje cell. The shades of grey indicate 1, 2 and 3 s.d. around the average. Each stimulus was repeated 154 times at 1 Hz. (D) For every stimulus condition, we averaged the PSTHs for all Purkinje cells that were significantly responsive to that particular stimulus (coloured lines; medians (inter-quartile range)). These were contrasted to the averaged PSTH of the other Purkinje cells (black lines). The pie charts represent the fraction of Purkinje cells significantly responsive to a particular stimulus. See also Table 1. (E) The peak responses of the significantly responding Purkinje cells were the lowest for sound only and for upper lip stimulation. \*  $p < 0.05$ ; \*\*  $p < 0.01$  (post-hoc tests after Kruskal-Wallis test) (F) As expected for complex spike responses to weak stimulation, the latencies were relatively long and variable, but consistent across types of stimulation. Only visual stimulation (LED) had a remarkably longer latency time. \*\*\*  $p < 0.001$  (post-hoc tests after Kruskal-Wallis test for LED vs. whisker pad, upper lip, lower lip and cheek and  $p < 0.05$  compared to sound only)

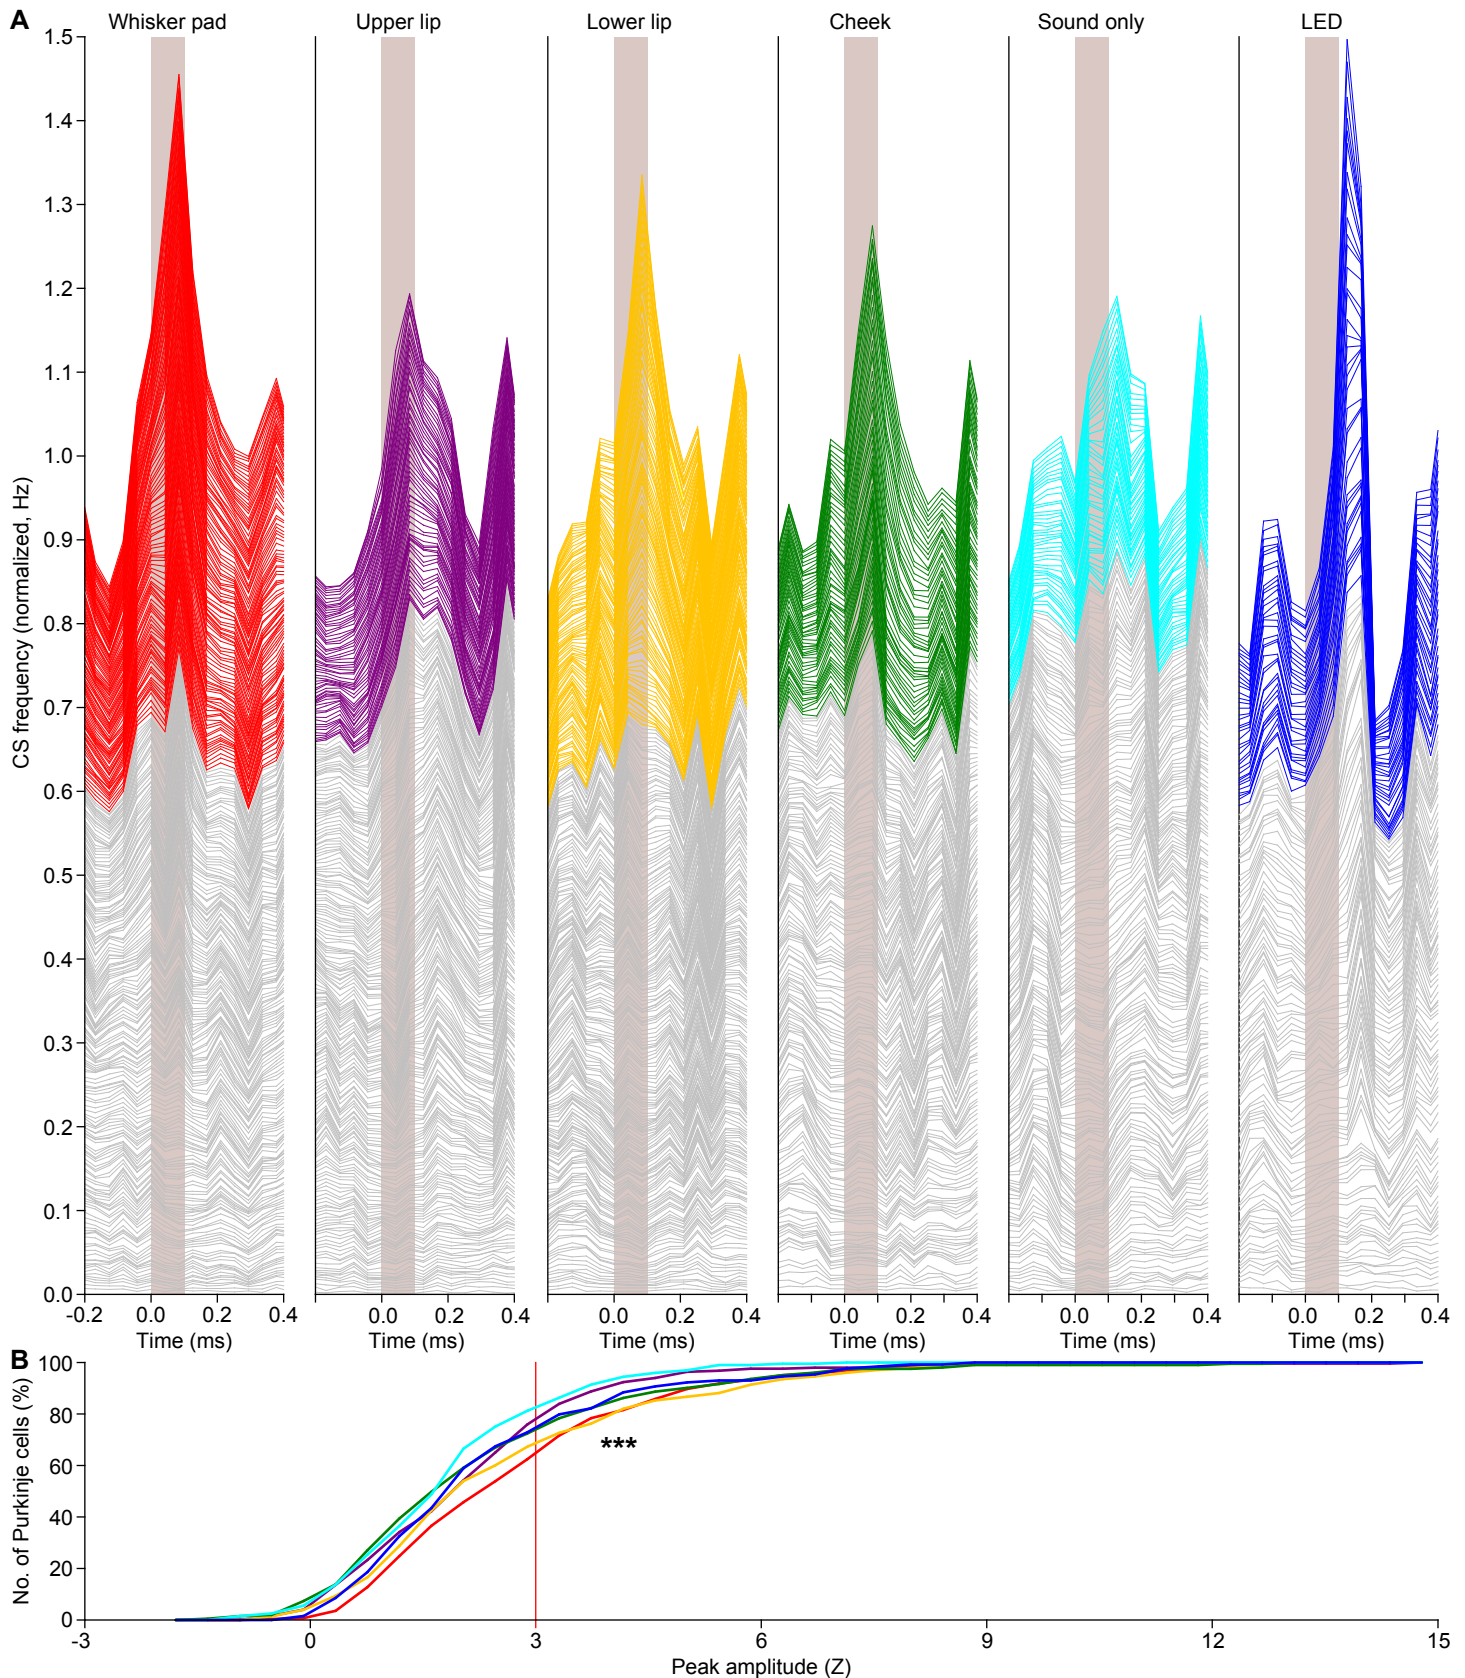

### Figure 5 – Variations in response strength

**(A)** Stacked line plots illustrating the peri-stimulus time histograms of all Purkinje cells recorded under either of the six indicated stimulus conditions. The cells are ordered based upon their peak responses (calculated as Z value) during the 200 ms interval following the stimulus onset, with the cell with the lowest response at the bottom of each graph. The grey lines indicate cells with a peak response deemed not significant ( $Z < 3$ ) and the coloured lines indicate the significant responses ( $Z > 3$ ). The graphs are normalized so that the upper line depicts the average of all cells. As shown in Fig. 4B, one cannot discriminate between responsive and non-responsive cells in a black-and-white fashion. Instead,

the cells form a continuum from not responsive at all to highly responsive. As this way of plotting relies on the numerical average, a skewed distribution can put emphasis on a relatively small group of cells. For this reason, the Purkinje cell responses are also compared using cumulative histograms **(B)** using the same colour scheme as in **(A)**. From this representation, it is confirmed that whisker pad and lower lip stimulation yield the strongest responses, while visual stimulation (LED) recruits a few cells with a relatively strong response, increasing the numerical average (see **(A)**). Here, we tested the complete distributions (\*\*\*)  $p < 0.001$ ; Kruskal-Wallis test). Pair-wise comparisons of all stimulus conditions are presented in Fig. 6.

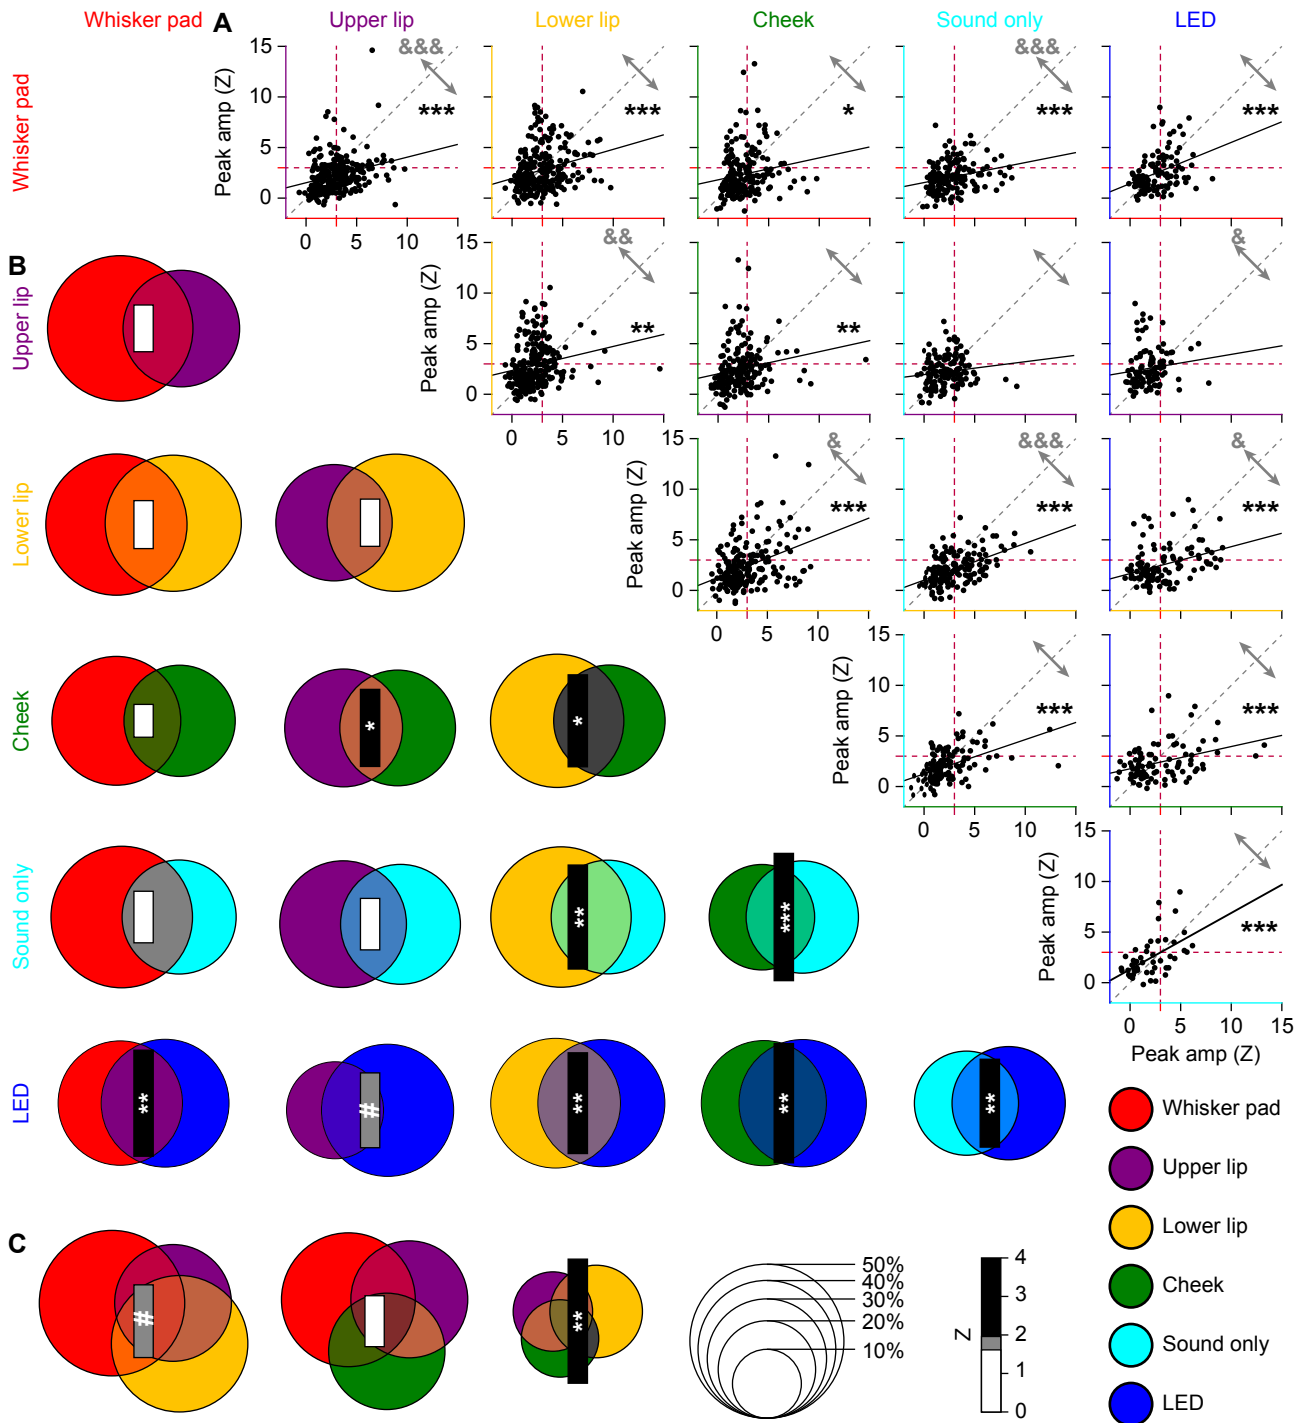

### Figure 6 – Convergence of sensory input on Purkinje cells

**(A)** In order to test whether sensory inputs converge on individual Purkinje cells in awake mice, we made pair-wise comparisons of the response amplitudes to two different stimuli per Purkinje cell (scatter plots). For all possible combinations, we found a positive slope of the linear regression analysis. For the majority of combinations, the correlation between response strengths was highly significant: \*  $p < 0.05$ , \*\*  $p < 0.01$  and \*\*\*  $p < 0.001$  (Pearson correlation with Benjamini-Hochberg correction for multiple comparisons). Only upper lip vs. sound only and upper lip vs. visual stimulation were not significantly correlated. For this analysis, we included all Purkinje cells, whether they had a statistically significant response or not. The red dotted lines indicate a Z-score of 3, which we set as the threshold for significance (cf. Fig. 4B). They grey arrows indicate the fraction of observations above

and below the unity line (grey dotted line). The relative strengths of each stimulus combination were compared in a pairwise fashion (Wilcoxon tests with Benjamini-Hochberg correction for multiple comparisons): &  $p < 0.05$ ; &&  $p < 0.01$ ; &&&  $p < 0.001$ . **(B)** We performed a similar analysis focusing only on statistically significant responses (Venn diagrams). Again, all combinations had a positive Z score (as evaluated by a bootstrap method; see Methods), indicating more than expected convergence. The diameter of each circle indicates the fraction of Purkinje cells showing a significant response to that particular, colour coded stimulus. The size of the bar represents the Z score of the overlapping fraction. **(C)** The same for the combinations of three tactile stimuli. Overall, sensory streams tended to converge, rather than diverge, on Purkinje cells. #  $p < 0.10$ ; \*  $p < 0.05$ , \*\*  $p < 0.01$  and \*\*\*  $p < 0.001$  (Z test with Benjamini-Hochberg correction).

**A - Whisker pad stimulation**

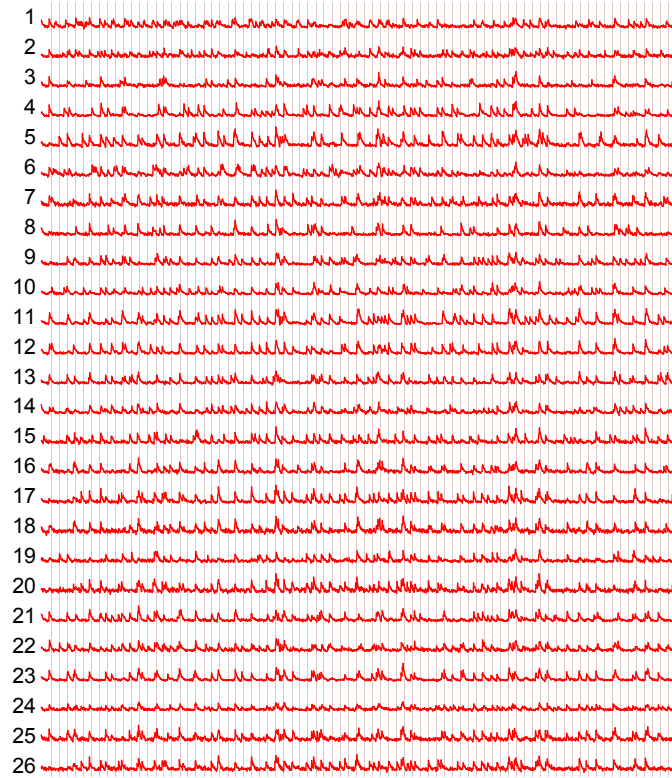

**B - Sound only stimulation**

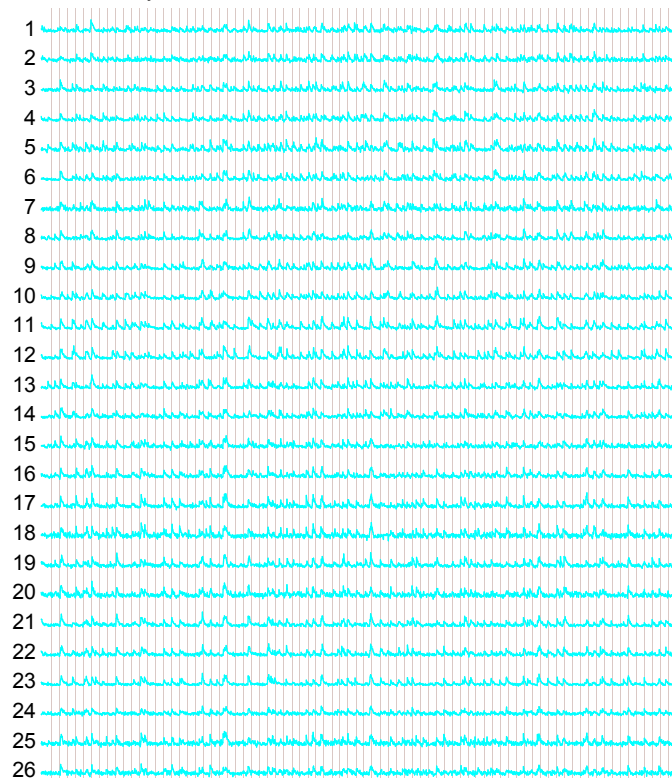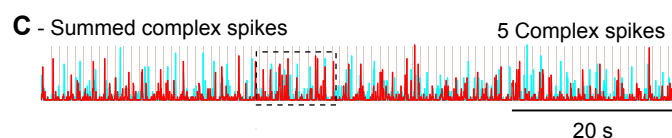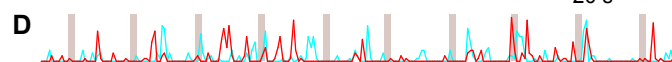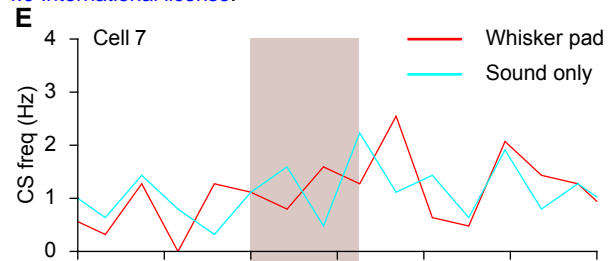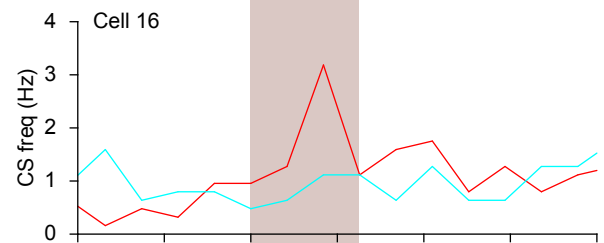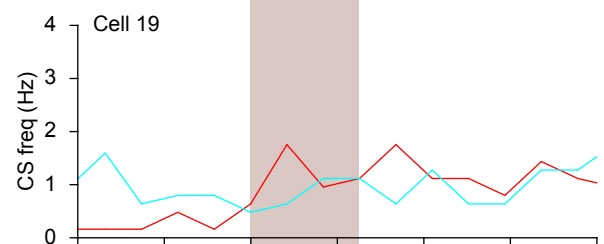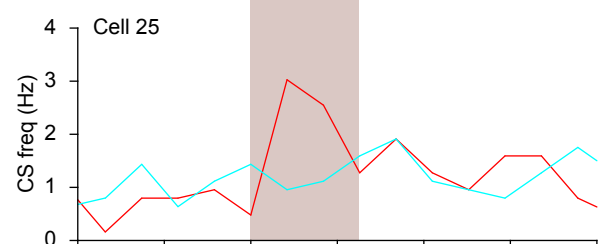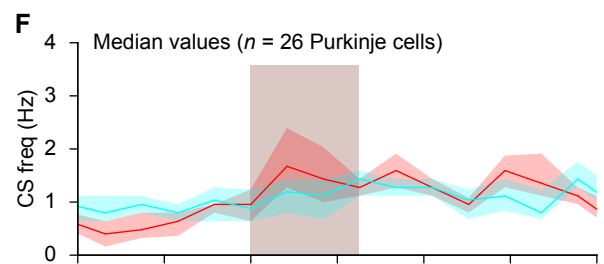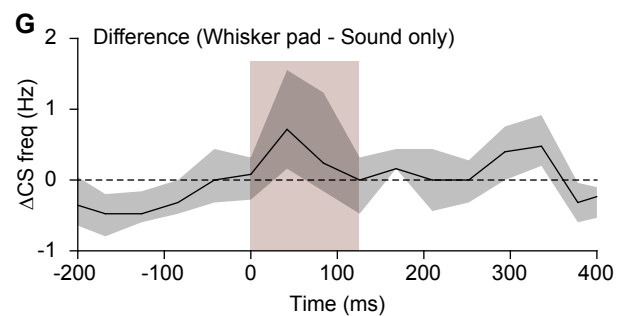

**Figure 7 – Sound only stimulation systematically recruited less complex spikes than tactile stimulation**

Fluorescent traces of 26 Purkinje cells in a field of view during whisker pad (A) and sound only (B) stimulation. The moments of stimulation (at 1 Hz) are indicated by the vertical lines. Note that the sound only stimulation involved the sound of the mechanical device delivering tactile stimuli. Overall, whisker pad stimulation triggered more complex spike responses than sound only as illustrated by the sum of the

events (C). The boxed part (10 s) is enlarged in D. (E) Peri-stimulus time histograms (PSTHs) of four randomly selected Purkinje cells from the experiment illustrated in A and B. In each, the response to whisker pad stimulation was stronger than to sound only stimulation, which is also reflected in the median of the PSTHs of all 26 Purkinje cells (F) and the median difference between whisker pad and sound only stimulation (G). The shaded areas indicate the inter-quartile range.

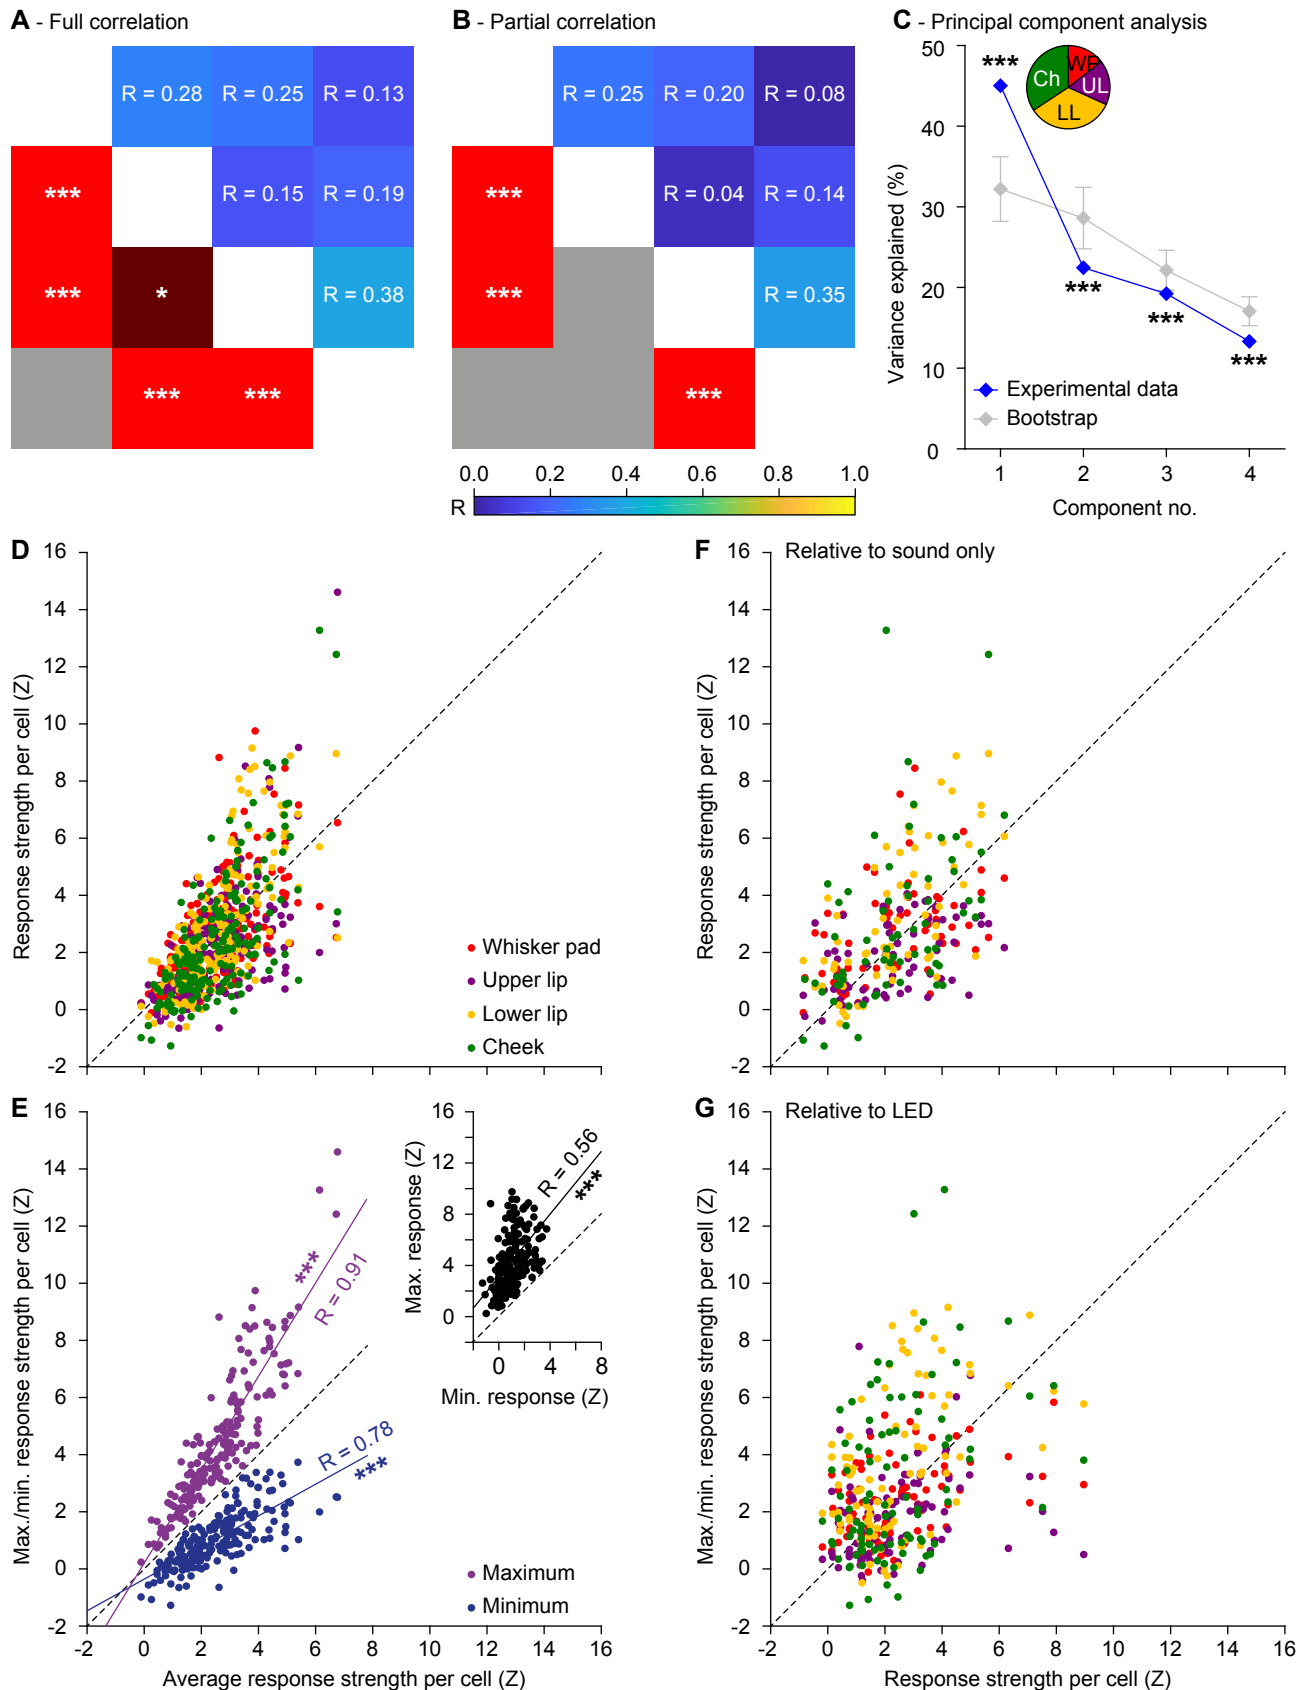

**Figure 8 – Purkinje cell excitation depends partially, but not completely, on generic sensory input.**

For the 188 Purkinje cells that received all four tactile stimuli, we calculated the full (A) and partial (B) correlation between the peak responses (in Z scores) of the four different tactile stimuli. This largely confirms the pair-wise correlations illustrated in Fig. 6A. Note, however, that the partial correlations are less pronounced than the full correlations, suggesting the existence of a common component reflecting general excitability, not specific for stimulus location. (C) Principal component analysis confirmed that a part of the observed variance can indeed be explained by a common factor, as the first principal component of the experimental data is significantly larger than that of bootstrapped data. Error bars indicate the 1-99% confidence interval. The inset shows the relative contributions of the different stimuli to the first principal

component. The relatively weak stimuli (lower lip and cheek) were more in tune with the general excitability than the stronger stimuli (whisker pad and upper lip). (D) Scatter plot showing the correlation between average response strength to the four tactile stimuli vs. the four response strengths per Purkinje cell. The Purkinje cells on the left were insensitive to whatever tactile stimulus we presented, those on the right were sensitive to any tactile stimulus, but showed a bias towards one or a few stimulus locations. This bias becomes more obvious when plotting the minimum and maximum response per Purkinje cell (E). Inset shows a strong correlation between the minimum and maximum response strength per Purkinje cell. R values come from Spearman's correlation test. Similar plots were made comparing the sound only (F) and LED (G) stimulation vs. the four tactile stimuli. \*  $p < 0.05$ , \*\*\*  $p < 0.001$

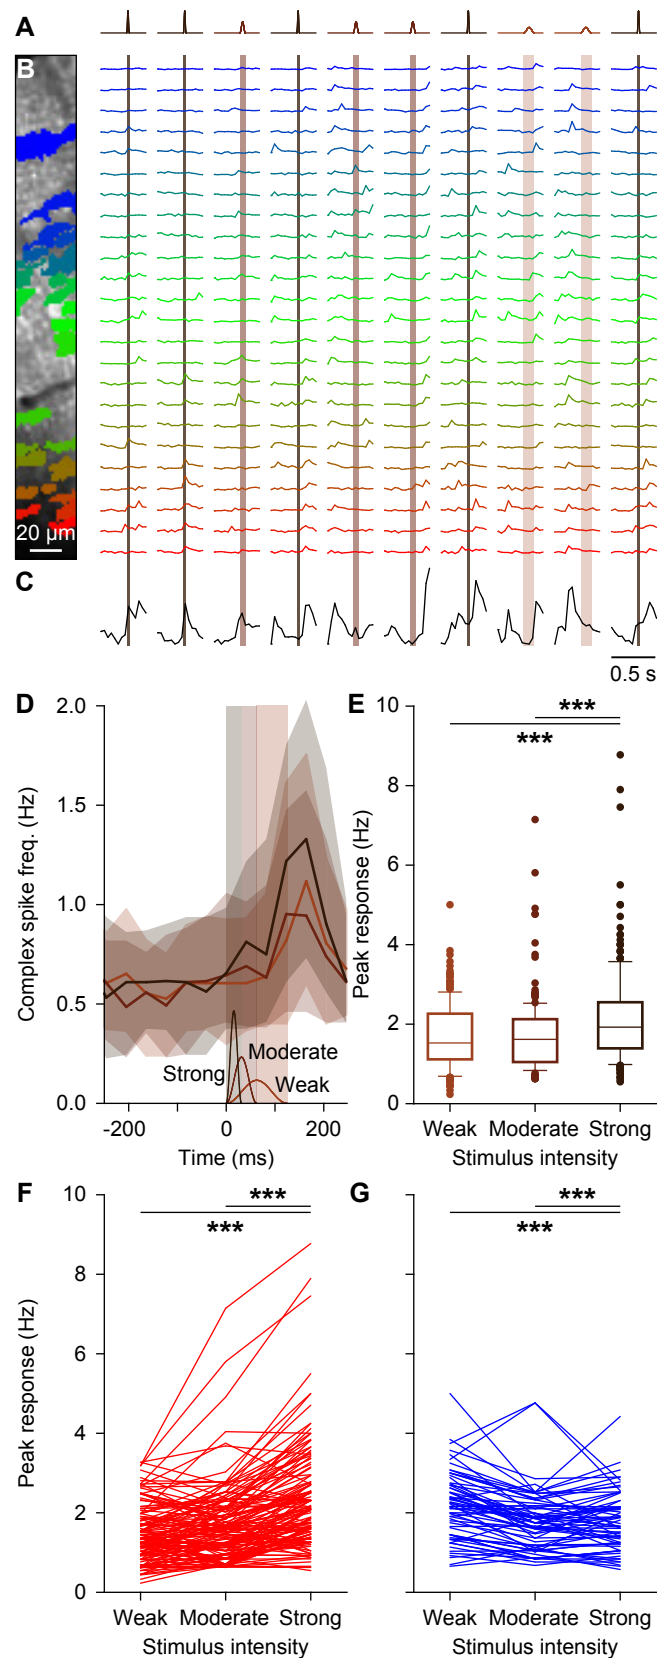

### Figure 9 – Stimulus strength has only a minor impact on complex spike responsiveness

**(A)** Movements of all large facial whiskers were performed using a piezo-actuator at three different speeds (weak: 1 mm displacement in 62 ms; moderate: 2 mm displacement in 31 ms; strong: 4 mm displacement in 16 ms). The stimulus sequence was randomly permuted. The recordings were made in awake mice. **(B)** Field of view with 24 identified and colour-coded Purkinje cells (left) and their corresponding fluorescent traces (right). Stimuli were presented every 2 s and in between trials the laser illumination was briefly blocked to avoid photobleaching. Note that the periods without laser illumination are not drawn to scale. The vertical shaded areas indicate stimulus duration (which was inverse with the stimulus strength). **(C)** Summed fluorescence trace composed of all 24 individual traces showing that not all trials evoked ensemble-wide responses. Some spontaneous, inter-trial

activity was also observed. **(D)** The median number of complex spikes per frame (of 40 ms) per trial (shaded areas: inter-quartile ranges) for the three stimulus strengths show little difference for the weak and moderate stimulation. The time course and amplitude (1-4 mm) of the three stimuli is schematized at the bottom of the graph. Strong stimulation elicited about 30% more complex spikes, as evident from the peak responses for each stimulus intensity. **(E)** Box plots showing the response strength for the 209 significantly responsive Purkinje cells (out of 340 Purkinje cells that were measured in this way). **(F)** Response rates for all Purkinje cells that showed an increase in response rate with increased stimulus intensity. Only a few cells stand out in that they show a strong response that consistently increases with stimulus strength (lines on top). **(G)** The same for the Purkinje cells that showed a decrease in response strength with increasing stimulus intensity. \*\*\*  $p < 0.001$  (Friedman's test).

**A - Whisker pad**

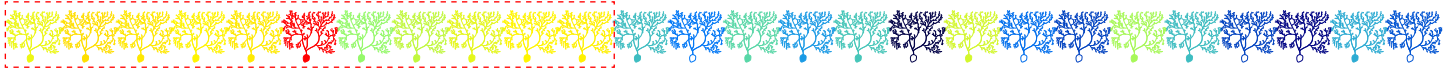

**B - Upper lip**

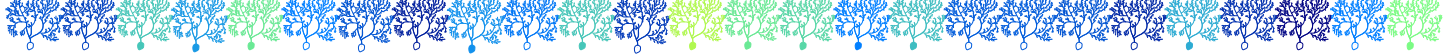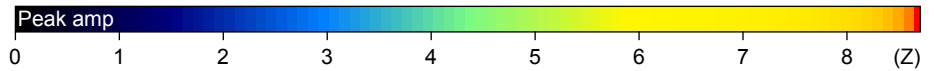

**C - All cells**

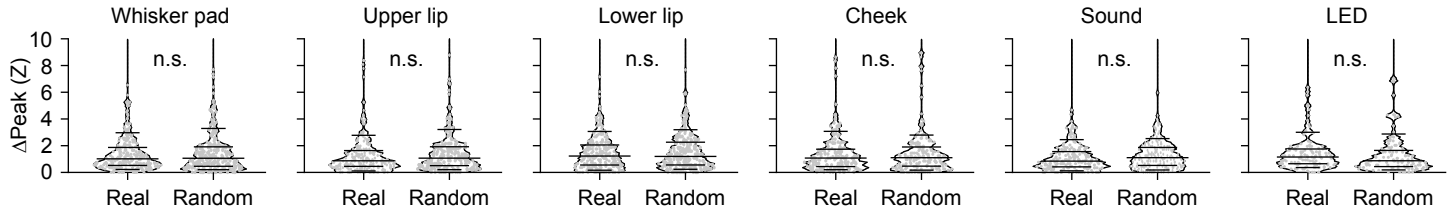

**D - Only significantly responsive cells**

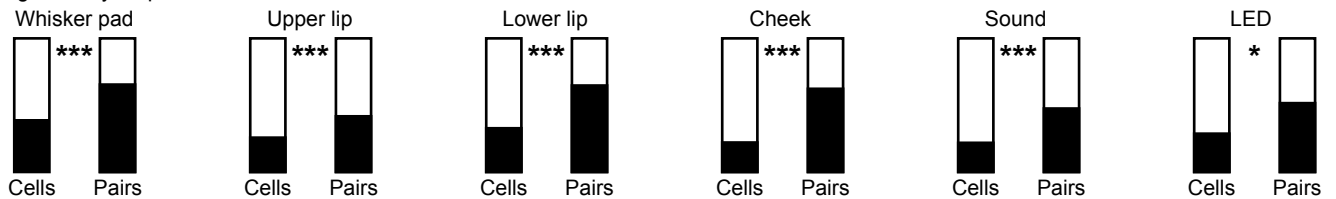

**Figure 10 - Purkinje cells encoding the same stimulus have a tendency to be spatially grouped**

Schematic drawing of a field of view with 26 Purkinje cells organized in the medio-lateral direction of crus 1 in an awake mouse. The colour of each Purkinje cell corresponds to the maximal response to whisker pad (A) or upper lip (B) stimulation. Purkinje cells with a filled soma had a peak response with a Z score > 3 and were considered to be statistically significant, in contrast to those with an open soma. Responsive and non-responsive cells are generally intermingled, but a group of “strong responders” can be observed for whisker pad stimulation (red rectangle). (C) The anecdotal data in A suggest the presence of clusters of Purkinje cells encoding specific stimuli. For this to be the case, one would expect that neighbouring Purkinje cells have roughly similar response strengths. We found that this assumption does not hold as the differences in response strengths of neighbours could not be discriminated from randomly selected cells in the same recording if all Purkinje cells are considered (compared with bootstrap analysis based upon randomly chosen cell pairs within each field

of view: all  $p > 0.8$ ; Z test). Data are represented in violin plots, with the grey lines indicating the 10<sup>th</sup>, 25<sup>th</sup>, 50<sup>th</sup>, 75<sup>th</sup> and 90<sup>th</sup> percentiles. (D) When considering only the Purkinje cells with statistically significant responses, spatial grouping does occur. For each stimulus type, the black portion of the left bar indicates the fraction of Purkinje cells showing a significant response to that stimulus. The filled portion of the right bar indicates the fraction of the neighbours (always on the medial side) of these significantly responsive Purkinje cells that were also significantly responsive. As can be seen, this fraction is always substantially larger than the fraction of significantly responsive Purkinje cells, indicating a tendency of similar Purkinje cells to group together. Statistical significance was tested by comparing the fraction of Purkinje cells with statistically significant responses and the fraction of neighbours of Purkinje cells with statistically significant responses that showed statistically significant responses as well (after correction for border effects) using Fisher’s exact test and after Benjamini-Hochberg correction for multiple comparisons: \*  $p < 0.05$ ; \*\*\*  $p < 0.001$ .



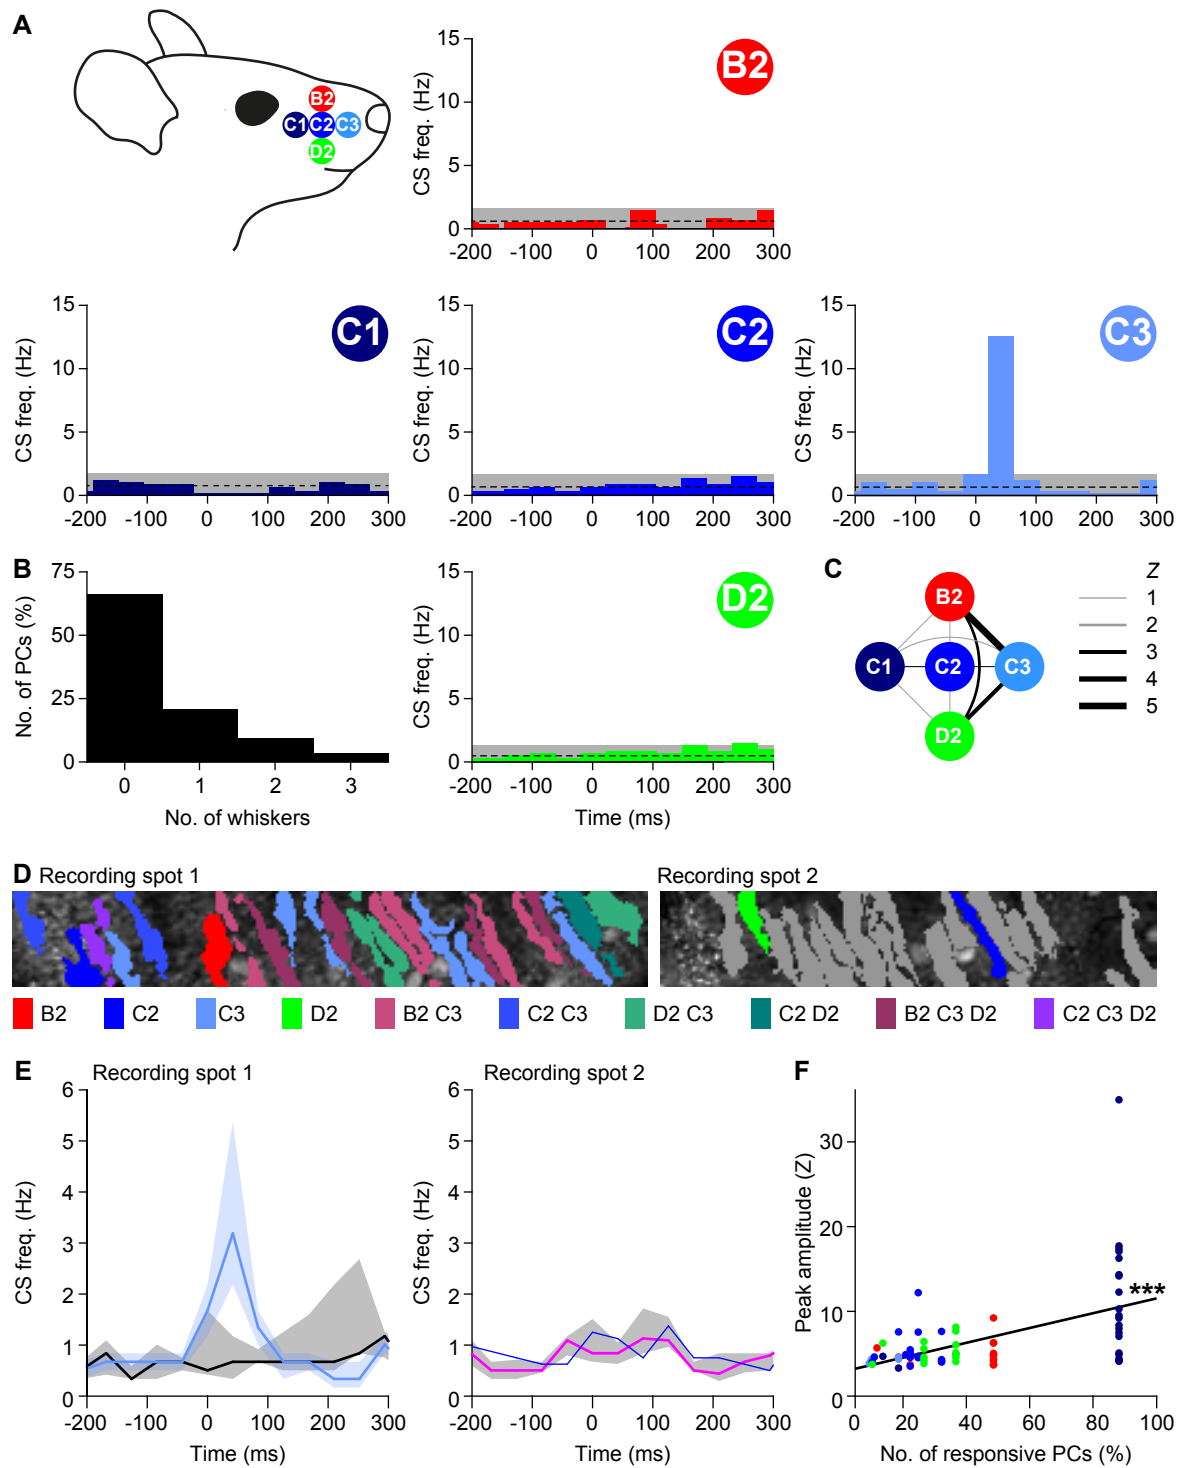

### Figure 11 – Purkinje cell responses to single whisker stimulation show weak clustering

**(A)** To investigate smaller receptive fields, we sequentially stimulated five of the large facial whiskers. To avoid interference with other whiskers during active movement, we performed these experiments under ketamine/xylazine anaesthesia. Most Purkinje cells, if responsive to single-whisker stimulation, responded only to one of the five whiskers **(B)**. This is illustrated by five peri-stimulus time histograms (PSTHs) from a single, representative Purkinje cell. This particular cell was sensitive to stimulation of the C3 whisker only. The average and 3 s.d. of the baseline firing are indicated (dashed line and grey area). **(C)** Purkinje cells that responded to more than one whisker were typically responsive to the more anterior whiskers (see also Table 5). The widths of the lines indicate the Z value of the occurrence of multiple responses per cell. **(D)** Two recording spots, in close proximity in crus

1 of the same animal, with the identified Purkinje cell dendritic trees. For each dendrite, the colour indicates the whisker(s) to which it was responsive (see legend below with grey denoting the absence of a statistically significant response). **(E)** For each of the two recording sites, the medians of the responsive and the non-responsive Purkinje cells are indicated (to the C3 whisker in the left panel and to the C2 whisker in the right panel). Note that only a single cell was responsive to C2 stimulation in recording spot 2. The shades indicate inter-quartile ranges. **(F)** Linear regression revealed that Purkinje cells that were surrounded by other Purkinje cells responsive to the same whisker (same colour code as in **A**) had a tendency to show stronger responses to stimulation of that whisker than Purkinje cells that were more isolated. The x-axis represents the fraction of Purkinje cells responsive to the particular whisker within the respective field of view.  $R = 0.521$ ;  $p < 0.001$ .

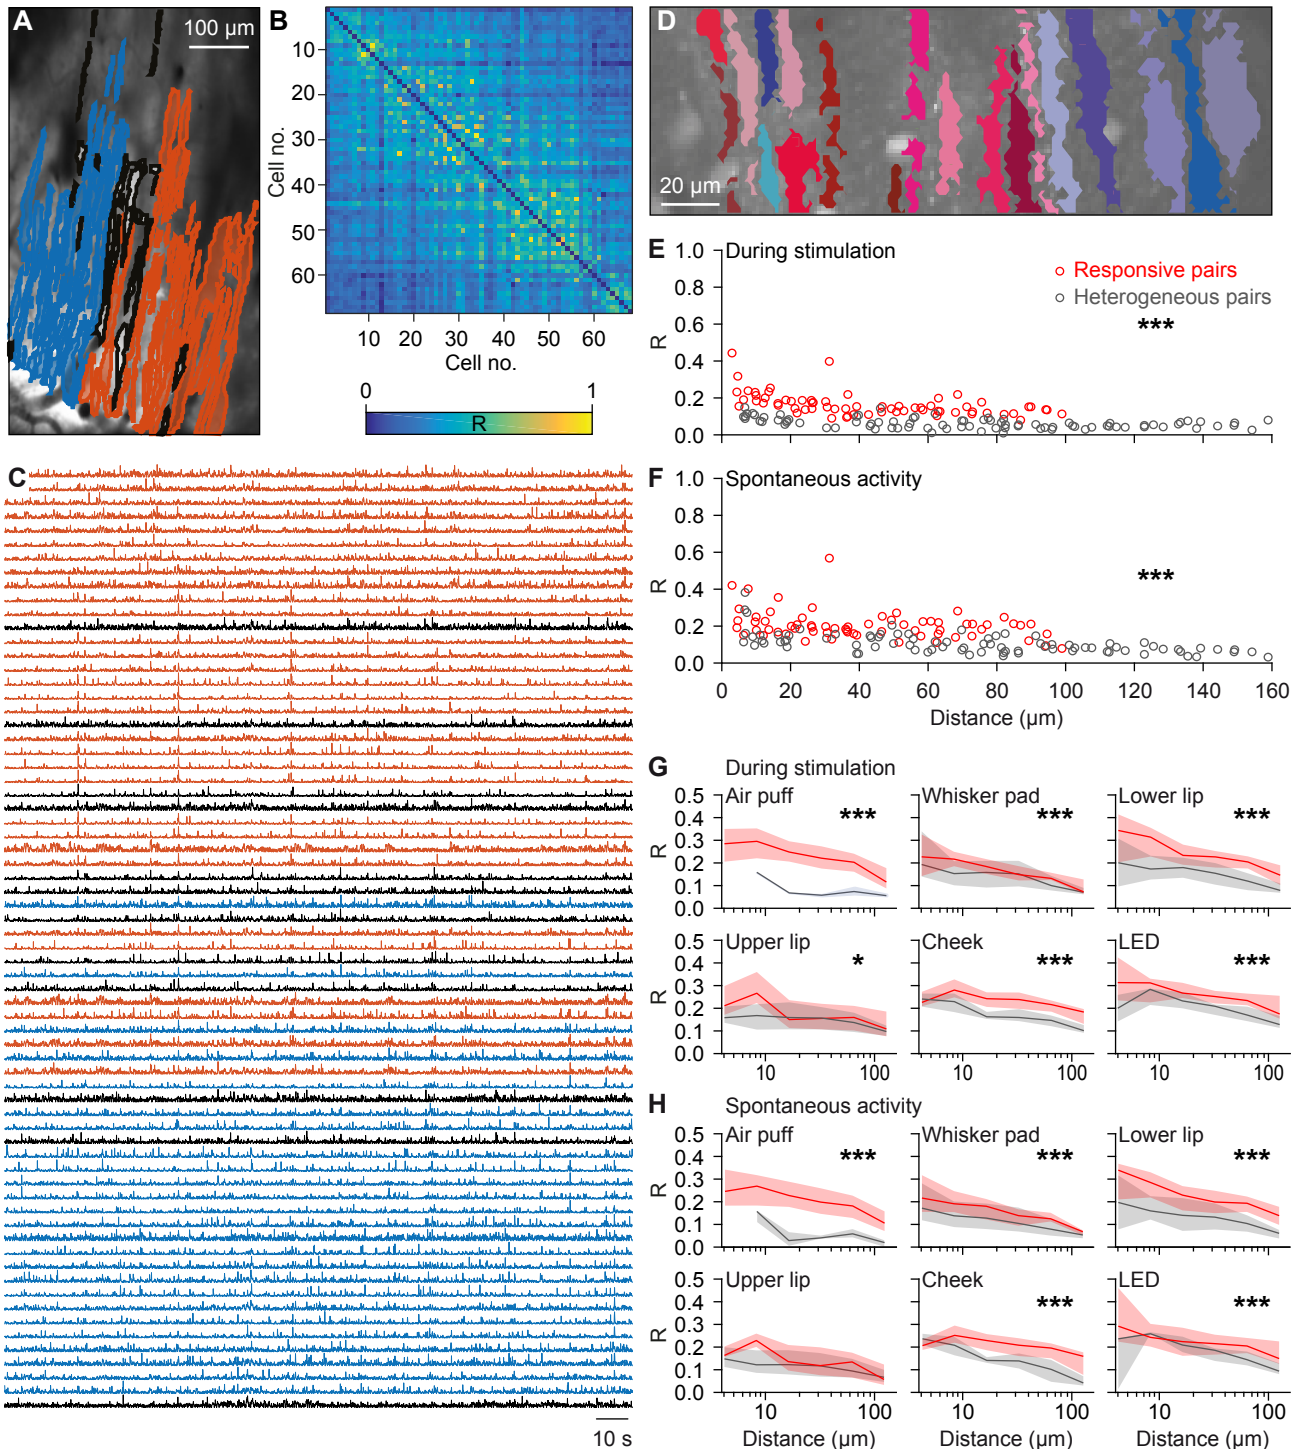

**Figure 12 – Purkinje cells encoding the same response are closer together**

(A) To compare the extent of synchronous firing between the medio-lateral and the antero-posterior axes, we made recordings with a larger field of view. Identified Purkinje cell dendrites in a representative field of view colour-coded according to their membership of one of the two clusters identified with meta k means clustering (Dunn index = 0.85). The dendrites indicated in grey could not be contributed to either of the two groups. (B) Heat map of the pair-wise comparisons of the correlation between firing of the dendrites shown in A. Although two clusters were identified, it is clear that under our recording conditions, synchronous firing is not strictly related to a single micro-zone. (C) Raw traces of the neurons indicated in A and B. (D) As most of the variation was along the medio-lateral axis, we continued with smaller fields of view oriented along the medio-lateral axis. Representative field of view with segmented Purkinje cell dendrites. Non-responsive cells are depicted in shades of blue and responsive cells in shades of red during whisker pad stimulation. (E) For each pair of Purkinje

cells we calculated the correlation coefficient (R) during 1 Hz whisker pad stimulation. The pairs of two Purkinje cells that were both responsive to whisker pad stimulation had on average a higher level of synchrony than the pairs connecting a responsive and a non-responsive Purkinje cell ( $p < 0.001$ ; two-dimensional Kolmogorov-Smirnov test). The pairs consisting of two non-responsive Purkinje cells were excluded from this analysis. (F) Interestingly, even in the absence of sensory stimulation, the pairs of Purkinje cells that were both responsive to whisker pad stimulation maintained a higher level of synchrony than “heterogeneous pairs”. Thus, Purkinje cells with the same receptive field tended to fire more synchronously, even in the absence of stimulation. This analysis was expanded in the presence (G) and absence (H) of sensory stimulation for six different types of stimulation and illustrated as the median R value per distance category (six bin values of equal distance at a log scale). The shaded areas represent the inter-quartile ranges. \*  $p < 0.05$ ; \*\*\*  $p < 0.001$  (Kolmogorov-Smirnov tests)

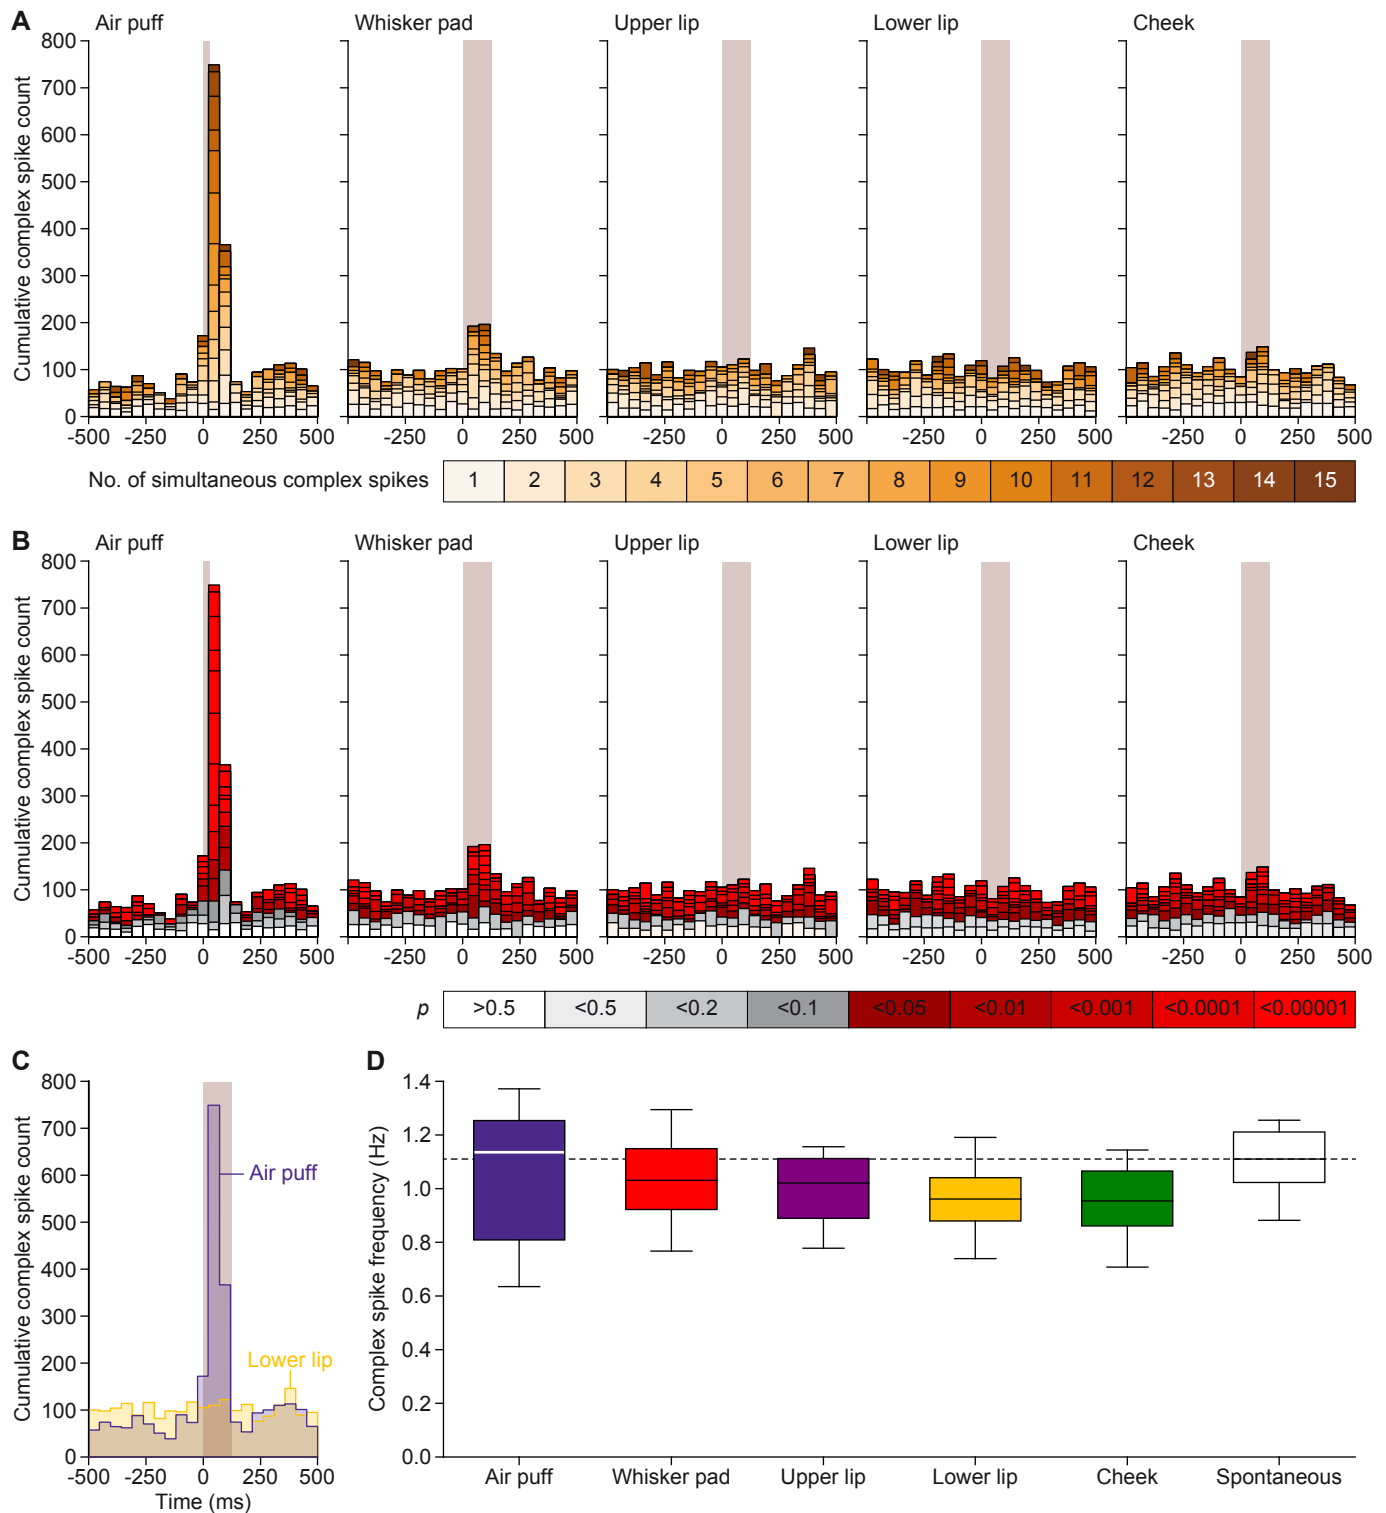

**Figure 13 – Purkinje cells encode strong and weak sensory stimulation via synchronous firing**

**(A)** Aggregate peri-stimulus time histograms (PSTHs) show that coherent firing of complex spikes predominantly occurs following sensory stimulation. For each field of view, we calculated the number of complex spikes occurring per frame, summing those of all Purkinje cells in that field of view. Subsequently, we made aggregate PSTHs where the colour of each bin refers to the number of dendrites simultaneously active. In this field of view, 17 Purkinje cells were measured. Of these, 17 (100%) reacted to air puff, 12 (71%) to whisker pad, 3 (18%) to upper lip, 4 (24%) to lower lip and 1 (6%) to cheek stimulation.

**(B)** Based upon a Poisson distribution of complex spikes over all dendrites and bins, one would expect between 0 and 3 simultaneously active dendrites (grey bars). The red bars indicate events involving

more dendrites simultaneously than expected from a random distribution. Thus, the sparse firing as expected by chance is relatively constant throughout the trials, but the simultaneous activity of multiple dendrites is strongly enhanced following sensory stimulation. **(C)** A direct overlay of the aggregate PSTHs in response to air puff and lower lip stimulation shows that the strong response found after air puff stimulation comes at the expense of intertrial complex spikes (152 trials per condition). **(D)** For equally long recordings in the presence of different types of stimulation, equal complex spike frequencies were observed as during spontaneous activity ( $F(2.544, 20.348) = 2.561$ ,  $p = 0.091$ , repeated measures ANOVA), indicating that sensory stimulation results in a temporal re-ordering of complex spikes, rather than to the production of more complex spikes.

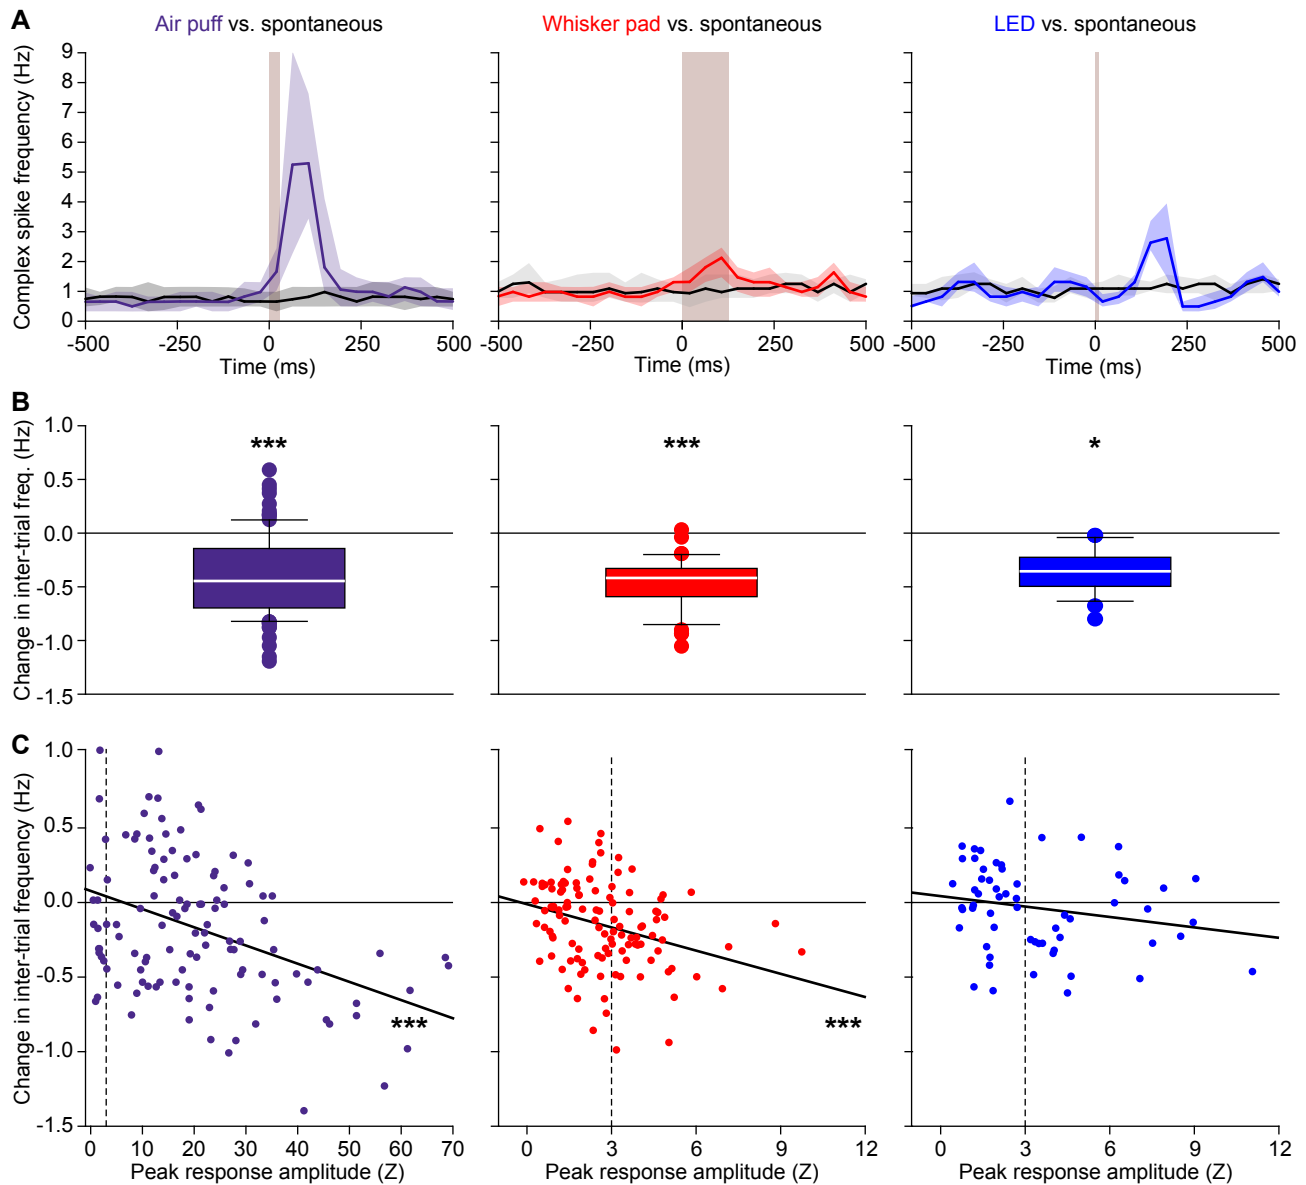

**Figure 14 – Sensory stimulation results in a temporal re-ordering of complex spikes**

**(A)** The temporal distribution of complex spikes was compared in a pairwise fashion between sessions with sensory stimulation and sessions without. For this analysis, we included only Purkinje cells that displayed a statistically significant response to the stimulus involved ( $n = 102$  for air puff,  $n = 45$  for whisker pad and  $n = 27$  for visual stimulation). The spontaneous recordings were analyzed by creating *post hoc* pseudo-stimuli at the same 1 Hz frequency as during sensory stimulation. Shown are the medians of the peri-stimulus time histograms. The shaded areas indicate the inter-quartile ranges. **(B)** The reduction in

baseline firing, measured during the -500 to -250 ms interval, was significant in all cases (Wilcoxon matched-pairs test after Benjamini-Hochberg correction for multiple comparisons). **(C)** The larger the response amplitude, the stronger the reduction in inter-trial firing (Pearson correlation tests after Benjamini-Hochberg correction for multiple comparisons). This analysis was performed on all Purkinje cells ( $n = 117$  for air puff and whisker pad stimulation and  $n = 60$  for LED stimulation; dotted lines mark the criterion for statistical significance at  $Z = 3$ ). Note the differences in the x-axis scaling with the air puff evoking relatively stronger responses. \*  $p < 0.05$ ; \*\*\*  $p \leq 0.001$
